1 **PTEN differentially regulates endocytosis, migration, and proliferation in the enteric**  
2 **protozoan parasite *Entamoeba histolytica***  
3  
4

5 Samia Kadri<sup>1, ¶</sup>, Kumiko Nakada-Tsukui<sup>2, ¶</sup>, Natsuki Watanabe<sup>1</sup>, Ghulam Jeelani<sup>1</sup>, and  
6 Tomoyoshi Nozaki<sup>1, \*</sup>  
7

8 <sup>1</sup>Department of Biomedical Chemistry, Graduate School of Medicine, The University of Tokyo,  
9 Tokyo, Japan; <sup>2</sup>Department of Parasitology, National Institute of Infectious Diseases, Tokyo,  
10 Japan.

11  
12 ¶These authors equally contributed to the work.

13  
14 \*Correspondence: T. Nozaki, [nozaki@m.u-tokyo.ac.jp](mailto:nozaki@m.u-tokyo.ac.jp)  
15

16 Author contributions: Conceptualization: KNT and TN; Data curation: SK and KNT; Formal  
17 Analysis: SK, KNT, GJ, and NW; Funding Acquisition: KNT, NW, and TN; Investigation: SK,  
18 KNT, and NW; Methodology: SK, KNT, NW, and TN; Project Administration: KNT, GJ, and  
19 TN; Resources: SK, KNT, NW, GJ, and TN; Supervision: TN; Validation: SK, KNT, and NW;  
20 Writing-Original Draft Preparation: SK and TN; Writing-Review and Editing: TN.

21  
22 **Abstract**

23 PTEN is a lipid phosphatase that is highly conserved and involved in a broad range of biological  
24 processes including cytoskeletal reorganization, endocytosis, signal transduction, and cell  
25 migration in all eukaryotes. Although regulation of phosphatidylinositol (3,4,5)-trisphosphate  
26 [PtdIns(3,4,5)P<sub>3</sub>] signaling via PTEN has been well established in model organisms and mammals,  
27 it remains elusive in the parasitic protist *E. histolytica*, which heavily relies on PtdIns phosphate(s)-  
28 dependent membrane traffic, migration, and phago- and trogocytosis for its pathogenesis. In this  
29 study, we characterized the major PTEN from *E. histolytica*, EhPTEN1, which shows the highest  
30 expression at the transcript level in the trophozoite stage among 6 possible PTENs, to understand  
31 the significance of PtdIns(3,4,5)P<sub>3</sub> signaling in this parasite. Live imaging of GFP-EhPTEN1  
32 expressing amebic trophozoites showed localization mainly in the cytosol with a higher  
33 concentration at pseudopods and the extending edge of the phago- and trogocytic cups.  
34 Furthermore, quantitative analysis of phago- and trogocytosis using a confocal image cytometer  
35 showed that overexpression of EhPTEN1 caused reduction in trogo- and phagocytosis while  
36 transcriptional gene silencing of *EhPTEN1* gene caused opposite phenotypes. These data suggest  
37 that EhPTEN1 has an inhibitory role in these biological processes. Conversely, EhPTEN1 acts as  
38 a positive regulator for fluid-phase and receptor-mediated endocytosis in *E. histolytica*  
39 trophozoites. Moreover, we showed that EhPTEN1 was required for optimal growth and migration  
40 of this parasite. Finally, the phosphatase activity of EhPTEN1 towards PtdIns(3,4,5)P<sub>3</sub> was  
41 demonstrated, suggesting that the biological roles of EhPTEN1 are likely linked to its catalytic  
42 function. Taken together, these results indicate that EhPTEN1 differentially regulates multiple  
43 cellular activities essential for proliferation and pathogenesis of the organism, via PtdIns(3,4,5)P<sub>3</sub>  
44 signaling. Elucidation of biological roles of PTEN and PtdIns(3,4,5)P<sub>3</sub> signaling at the molecular

45 levels promotes our understanding of the pathogenesis of this parasite and potentially leads to the  
46 design of novel therapeutics against amebiasis.

47

#### 48 **Author summary**

49 *Entamoeba histolytica* is an intestinal protozoan parasite that causes amoebic dysentery and liver  
50 abscesses in humans. It has been well understood how the amoeba's ability to ingest and destroy  
51 human cells and invade tissues contributes to disease symptoms such as bloody diarrhea. The  
52 underlying mechanisms for such activities, called pathogenicity, include trafficking (transport) and  
53 secretion of cytolytic proteins, migration (ameboid movement), and ingestion and destruction of  
54 human cells, heavily rely on the signal transduction system via metabolism (synthesis and  
55 decomposition) of phosphoinositides (phosphatidylinositols containing 0-5 phosphates), and  
56 downstream regulation of cytoskeleton (dynamic network of interlinking protein filaments, such  
57 as actin, in the cytoplasm). In this study, we characterized one enzyme called EhPTEN1, which  
58 degrades and inactivate PtdIns(3,4,5)P<sub>3</sub>. We have shown that EhPTEN1 is involved in migration,  
59 internalization of soluble and solid materials (endocytosis, trogo-, and phagocytosis). EhPTEN1  
60 apparently regulates cell migration, endocytosis, trogo-, phagocytosis, and proliferation in a  
61 complex fashion. Our findings help in the elucidation of the physiological significance of PTEN  
62 and cellular events regulated via phosphoinositides in this enteric parasite and other pathogenic  
63 parasites, and potentially lead to the development of new control measures against parasitic  
64 diseases.

65

#### 66 **Introduction**

67 Phosphatidylinositol phosphates (PIPs) are membrane phospholipids that play pivotal roles in a  
68 variety of biological processes such as cytoskeletal reorganization, vesicular trafficking,  
69 endocytosis, signal transduction, ion channel activation, and cell migration [1,2]. There are seven  
70 different species of PIPs in mammalian cells including three phosphatidylinositol monophosphate,  
71 three phosphatidylinositol biphosphate, and one phosphatidylinositol triphosphate [2]. PIPs  
72 kinases and phosphatases regulate the cellular function of PIPs through reversible phosphorylation  
73 and de-phosphorylation [3]. PTEN (phosphatase and tensin homologue) is a lipid phosphatase that  
74 dephosphorylates phosphatidylinositol (3,4,5)-triphosphate [PtdIns(3,4,5)P<sub>3</sub>] to  
75 phosphatidylinositol (4,5)-biphosphate [PtdIns(4,5)P<sub>2</sub>], thus depleting cellular signaling  
76 processes downstream of PtdIns(3,4,5)P<sub>3</sub> [4]. PtdIns(3,4,5)P<sub>3</sub> acts as a secondary messenger which  
77 activates the proto-oncogenic PI3K–AKT signaling pathway [5]. PTEN plays a crucial role in cell  
78 proliferation through its cytoplasmic phosphatase activity against the PI3K–AKT cascade [6]. Also,  
79 PTEN regulates cell polarity and migration via the establishment of a PtdIns(3,4,5)P<sub>3</sub>-  
80 PtdIns(4,5)P<sub>2</sub> gradient [7,8]. Many human cancers are associated to PTEN mutations, including  
81 endometrial tumors, glioblastoma, prostate carcinoma, melanoma, and hereditary cancer  
82 predisposition syndromes, such as Cowden disease [9,10]. Furthermore, PTEN can modulate  
83 immune responses by regulating Fcγ receptor-mediated phagocytosis [11,12].

84 Human amebiasis is caused by the infection of the enteric protozoan parasite *Entamoeba*  
85 *histolytica*. World Health Organization estimates 50 million people throughout the world suffers  
86 from amebic infections, resulting in around 100,000 deaths annually [13]. Infection by *E.*  
87 *histolytica* usually occurs via ingestion of fecally contaminated food or water with the infective  
88 cyst of this parasite [14]. Destruction of intestinal epithelial tissue by amoebic trophozoites causes  
89 colitis and amoebic dysentery while in some patients trophozoites can infect extraintestinal organs

90 where they form abscesses [15]. It is known that the virulence mechanisms of *E. histolytica* are  
91 sustained by actin-associated processes such as migration, adhesion, and trogo-/phagocytosis as  
92 well as vesicular traffic involved in the secretion of proteases [16-19]. A sufficient set of PI-kinases  
93 and phosphatases to generate 7 species of phosphoinositides appear to be conserved in *E.*  
94 *histolytica* [20]. AGC kinases have recently been identified as PtdIns(3,4,5)P<sub>3</sub>-binding proteins  
95 and shown to be involved in trogocytosis and phagocytosis in *E. histolytica* [21]. Physiological  
96 significance of PtdIns(3)P- and PtdIns(4)P-binding proteins including FYVE domain-containing  
97 proteins was shown [22]. In addition, the distinct roles of PtdIns(3)P-binding sorting nexins  
98 (SNXs) in trogocytosis have been demonstrated in *E. histolytica* [23]. Among them,  
99 PtdIns(3,4,5)P<sub>3</sub>-mediated signaling is assumed to have a pivotal role in *E. histolytica* virulence.  
100 Although physiological roles of PTEN have been well established in higher eukaryotes, the role  
101 of PTEN in *E. histolytica* in pathogenesis remains elusive.

102 In the present study, we characterized the biological roles of EhPTEN1, which shows the  
103 highest expression at the transcript level in the trophozoite stage among six putative PTENs  
104 encoded by the genome. We have shown that EhPTEN1 is enzymatically active against  
105 PtdIns(3,4,5)P<sub>3</sub> and is required for optimal growth of *E. histolytica* cells. We have also found that  
106 EhPTEN1 is involved in the regulation of different modes of endocytosis, namely fluid-phase  
107 endocytosis, receptor-mediated endocytosis, phago-, trogocytosis, and cell migration.

108

## 109 **Results**

### 110 **Identification and features of *PTEN* genes in *E. histolytica***

111 A genome-wide survey of PTEN in the genome of *E. histolytica* HM-1:IMSS reference strain  
112 (AmoebaDB, <http://amoebadb.org>) by BLASTP analysis using human PTEN (P60484) as a query,

113 revealed that *E. histolytica* possesses 6 possible PTEN or PTEN-like proteins that contain PTEN  
114 phosphatase domain, and show different domain configurations (Fig 1A) [20]. We tentatively  
115 designated them firstly in an ascending order of the number of recognizable domains and secondly  
116 in a descending order of the overall length (EhPTEN1, EHI\_197010; EhPTEN2, EHI\_098450;  
117 EhPTEN3, EHI\_131070; EhPTEN4, EHI\_054460; EhPTEN5, EHI\_041900; EhPTEN6,  
118 EHI\_010360). Our previous transcriptome data [24-26] verified that one protein (EhPTEN1,  
119 EHI\_197010) is highly expressed in the trophozoite stage in both *E. histolytica* HM-1: IMSS cl6  
120 and G3 strains, while the 5 other PTENs are expressed at relatively low levels (Fig 1B). EhPTEN1  
121 shows 39% mutual identity to human PTEN at the amino acid level (S1 Table). Multiple sequence  
122 alignment by ClustalW program (<http://clustalw.ddbj.nig.ac.jp>) shows that the key catalytic  
123 residues in the phosphatase domain (H-C-K/R-A-G-K-G-R) needed for lipid and protein  
124 phosphatase activity [4,27] are well conserved in EhPTEN1 (Fig 1C). In addition, the  
125 PtdIns(4,5)P<sub>2</sub>-binding motif (K/R-x4-K/R-x-K/R-K/R-R, PDM domain), which is predicted to  
126 regulate the recruitment of protein to the plasma membrane, located at the amino terminus, is also  
127 conserved in EhPTEN1 [6,28]. The cytosolic localization signal (D-G-F-x-L-D-L, CLS), where  
128 mutation of phenylalanine was shown to induce nuclear localization [29], as well as threonine and  
129 isoleucine responsible for TI loop formation in an extension of the active site pocket are also  
130 conserved (Fig 1C) [27]. EhPTEN1 also possesses C2 domain which has an affinity for membrane  
131 phospholipids and helps PTEN to be recruited to the cell membrane [27]. InterPro domain search  
132 annotates the region of a.a. 550-680 of EhPTEN1 as a domain of unknown function (DUF457).  
133 The two PEST sequences, rich in proline, glutamic acid, serine, and threonine, at the C terminus  
134 of human PTEN, are not conserved in EhPTEN1. Although PEST sequences are known to enhance  
135 proteolytic sensitivity, the regulation of EhPTEN1 functions may differ from the human PTEN

136 [30]. EhPTEN1 also lacks PDZ-binding motif (T/S-x-V) located at the C-terminal end in human  
137 PTEN and facilitates the protein-protein interactions [6,31]. The ~400 a.a. carboxyl-terminal  
138 extension which is absent in human ortholog and rich in charged amino acids could be involved in  
139 regulating its protein-protein interactions.

#### 140 **Cellular localization and dynamics of EhPTEN1 in the motile *E. histolytica* trophozoite**

141 To examine the cellular localization of EhPTEN1 in trophozoites, we established a transformant  
142 line expressing EhPTEN1 with the GFP-tag at the amino terminus (GFP-EhPTEN1). The  
143 expression of GFP-EhPTEN1 or GFP (control) in transformant trophozoites was verified by  
144 immunoblot analysis using anti-GFP antibody. A single band corresponding to non-truncated GFP  
145 fusion protein with an expected molecular mass of GFP-EhPTEN1 (90 kDa plus 26 kDa for the  
146 GFP tag) was observed in the GFP-EhPTEN1-expressing transformant (Fig 2A). Live imaging  
147 analysis revealed that GFP-EhPTEN1 was localized throughout the cytosol (Fig 2B and S1 Movie).  
148 The line intensity plots across the GFP-PTEN1 overexpressing trophozoites further demonstrated  
149 the enrichment of GFP-PTEN1 along the extended pseudopod of the motile trophozoite (Fig 2B)  
150 (Two additional images are also show in S1A and S1B Fig). The normalized average fluorescence  
151 intensities at the leading regions of pseudopods were nearly 1.5-fold higher in GFP-EhPTEN1  
152 overexpressing trophozoites compared to mock transformants (Fig 2C). Furthermore, the intensity  
153 line plot of GFP-expressing control strain showed no accumulation of GFP signal on pseudopods  
154 (S2 Fig and S2 Movie). These findings confirm the enrichment of GFP-EhPTEN1 in the  
155 pseudopod-like protrusive structures. Similarly, immunofluorescence imaging of HA-EhPTEN1  
156 overexpressing trophozoites using anti-HA antibody revealed that HA-EhPTEN1 was localized in  
157 the cytoplasm in steady-state, and enriched in pseudopods (S3B and S3C Fig). The migration  
158 (motility) of the GFP-EhPTEN1 overexpressing trophozoites using the montage of time-lapse

159 imaging was  $0.54 \pm 0.09$   $\mu\text{m}/\text{sec}$  (mean $\pm$ S.D.), which was significantly greater than that of control  
160 GFP expressing transformants ( $0.27 \pm 0.08$   $\mu\text{m}/\text{sec}$ ) (Fig 2D). We also investigated the effect of  
161 repression of *EhPTEN1* gene expression and found that *EhPTEN1* gene silencing reduced  
162 migration (see below).

### 163 **Localization of EhPTEN1 during trogocytosis and phagocytosis**

164 The fact that EhPTEN1 was previously identified as a PtdIns(3)P-binding effector and suggested  
165 to be involved in the phagosome biogenesis [23], prompted further characterization of the role of  
166 EhPTEN1 in host cell internalization. To examine the role of EhPTEN1 in ingestion of mammalian  
167 cells, we first examined trogocytosis (i.e., nibbling or chewing of a part of a live cell) of Chinese  
168 hamster ovary (CHO) cells by GFP-EhPTEN1 and GFP expressing transformant lines. We co-  
169 cultured trophozoites of the two transformant lines with live CHO cells that had been stained with  
170 CellTracker Orange. Time-lapse imaging of trogocytosis of CHO cells by the amoebae (Fig 3A  
171 and S3 Movie) revealed that GFP-EhPTEN1 was accumulated in the region that covers, but not  
172 always in close proximity to, the tunnel-like structure, which is the extended neck (or tube)-like  
173 structure connecting the enclosed (or being enclosed) trogosome and the remaining portion of the  
174 target cell that is partially ingested (Fig 3A-3D). Upon completion of closure of the trogosome,  
175 GFP-EhPTEN1 appeared to be dissociated from the region around the trogosome and the tunnel-  
176 like structure (Fig 3A-3E). The quantification of the fluorescence intensity in a cross section of the  
177 cell confirmed the dynamism of GFP-EhPETN1 during trogocytosis (Figs 3B-3E). In contrast, at  
178 the very early phase of trogocytosis, GFP-EhPTEN1 was not concentrated on the newly formed  
179 trogocytic cup.

180 The dynamics of GFP-EhPTEN1 in a course of phagocytosis (i.e., internalization with a  
181 single bite, not multiple bites) of dead CHO cells was also examined. The live imaging of GFP-



182 EhPTEN1 expressing trophozoites co-cultured with pre-killed CHO cells (Fig 4 and S4 Movie)  
183 showed an enrichment of GFP-EhPTEN1 at the tip of the leading edge of the phagocytic cup during  
184 the internalization of dead host cells until phagosome closure (Fig 4A and 4B). Soon after closure  
185 of the phagosome, GFP-EhPTEN1 was concentrated on the closing side of the phagosome (Fig  
186 4A-4C), and rapidly disappeared soon after (Fig 4D). The fluorescence intensity line plot of a cross  
187 section (as indicated by arrows) of the cell also reinforced the observation (Figs 4A-4D). As control,  
188 GFP-expressing mock strain showed no observable concentration of GFP signal in a course of  
189 CHO ingestion (S5 Movie and S4 Fig).

### 190 **Effect of overexpression of EhPTEN1 on trogocytosis and phagocytosis**

191 The dynamism of GFP-EhPTEN1, as revealed by live imaging, suggests that EhPTEN1 plays a  
192 role in the early to middle stages of trogo- and phagocytosis. We examined the effect of GFP-  
193 EhPTEN1 overexpression on the efficiency (i.e., speed and volume of internalization of prey) of  
194 trogocytosis and phagocytosis. GFP-EhPTEN1 expressing and mock transformant strains were  
195 incubated with either live or pre-killed CHO cells that had been stained with CellTracker Orange  
196 to allow trogocytosis or phagocytosis, respectively. Internalization of CHO cells by the amoebae  
197 was measured by CQ1 confocal quantitative image cytometer (Figs 5 and 6). Three parameters  
198 were measured and compared between GFP-EhPTEN1 expressing and mock transformant strains:  
199 the number of CHO-containing trogosomes or phagosomes per ameba (Figs 5A and 6A), the  
200 volume of all CHO-containing trogosomes or phagosomes per ameba (Figs 5B and 6B), and the  
201 percentage of the amoebae that ingested CHOs (Figs 5C and 6C ). GFP-EhPTEN1 overexpression  
202 caused statistically significant reduction in all three parameters in both trogocytosis and  
203 phagocytosis.

### 204 **Gene silencing of *EhPTEN1* enhances trogocytosis and phagocytosis in *E. histolytica***

205 Conversely, we attempted to verify if repression of *EhPTEN1* gene expression by antisense small  
206 RNA-mediated transcriptional gene silencing [32] causes reverse phenotypes: enhancement of  
207 trogocytosis and phagocytosis. The silencing of the *EhPTEN1* gene expression was confirmed by  
208 RT-PCR and the level of silencing was estimated to be approximately  $77.0 \pm 9.2\%$  compared to the  
209 mock control (G3 transfected with the empty psAP2-Gunma vector) (Fig 7A and 7B). Non-specific  
210 off-target gene silencing of other *EhPTEN* genes (*EhPTEN2-6*) was ruled out, except for *EhPTEN2*,  
211 which showed a slight reduction in *EhPTEN1* gene silenced strain, validating gene-specific silencing  
212 (S5 Fig). The *RNA pol II* transcript level was also unaffected. *EhPTEN1* gene silenced and mock  
213 transformants were cultivated with live or dead CHO cells and images were captured every 10 min  
214 for 1 hr. As expected, *EhPTEN1* gene silenced strain showed an enhancement of trogocytosis and  
215 phagocytosis (Fig 8). All three parameters to evaluate trogocytosis and phagocytosis, as above,  
216 i.e., the number of CHO-containing trogosomes or phagosomes per ameba (Figs 8A and 8B), the  
217 volume of all CHO-containing trogosomes or phagosomes per ameba (Figs 8C and 8D), and the  
218 percentage of the amebae that ingested CHOs (Figs 8E and 8F) was significantly increased in  
219 *EhPTEN1* gene silenced strain compared to the mock control stain. For instance, the volume of  
220 trogosomes and phagosomes increased by around 1.4 fold for trogocytosis and 2 fold for  
221 phagocytosis, respectively, in *EhPTEN1* gene silenced strain at later time points of coincubation  
222 (at 40-60 mins). Together with the results of *EhPTEN1* overexpression, shown above, these data  
223 indicate that *EhPTEN1* serves as a negative regulator of trogocytosis and phagocytosis.

224 ***EhPTEN1* is a positive regulator for the fluid-phase and receptor-mediated endocytosis in *E.***

225 *histolytica*

226 To investigate the role of *EhPTEN1* in pinocytosis of the fluid-phase marker and receptor-  
227 mediated endocytosis, we examined the internalization of RITC dextran and transferrin.

228 Pinocytosis was analyzed by measuring, on a fluorometer, the fluorescence intensity of fluid-phase  
229 marker, RITC dextran, which was internalized after incubation of amoebic transformants with  
230 RITC dextran at 35°C for up to 1 hr. Overexpression of GFP-EhPTEN1 cause approximately 30%  
231 increase in pinocytosis in comparison to mock control ( $53\pm 5.3$  or  $28\pm 13\%$  at time 30 or 60 min,  
232 respectively;  $p < 0.05$ , Fig 9A). Conversely, *EhPTEN1* gene silenced strain showed an  
233 approximately 30% decrease in pinocytosis at 30-60 min, as compared to mock control cells  
234 ( $30\pm 8.2$  or  $25\pm 5.1\%$  decrease at time 30 or 60 min, respectively,  $p < 0.05$ , Fig 9B).

235 We next examined internalization of transferrin conjugated with AlexaFluor 568 by CQ1  
236 image cytometer. Transferrin is presumed to be internalized via receptor-mediated endocytosis.  
237 The volume of endosomes that contained transferrin-AlexaFluor 568 increased by 30-50% in GFP-  
238 EhPTEN1 overexpressing trophozoites compared to mock control at all time points up to 1 hr  
239 ( $p < 0.05$ , Fig 10A). Conversely, transferrin endocytosis decreased by 30-40% in *EhPTEN1* gene  
240 silenced strain compared to the mock strain at 40-60 mins ( $p < 0.05$ , Fig 10B). These data indicate  
241 that EhPTEN1 positively regulates pinocytosis of the fluid-phase marker and receptor-mediated  
242 endocytosis in *E. histolytica*.

### 243 **EhPTEN1 is essential for optimum growth and migration of *E. histolytica***

244 The biological role of EhPTEN1 in trophozoite, phagocytosis, and endocytosis was clearly  
245 demonstrated as above. To investigate other physiological roles of EhPTEN1 in *E. histolytica*, the  
246 growth kinetic was monitored in *EhPTEN1* gene silenced and control strains. *EhPTEN1* gene  
247 silencing caused significant growth defect: the population doubling time of *EhPTEN1* gene  
248 silenced and control strains was  $28.1\pm 0.41$  and  $19.1\pm 0.52$  hr, respectively ( $P < 0.05$ ; Fig 7C). We  
249 next examined the migration of the trophozoites of *EhPTEN1* gene silenced and control strains

250 using time lapse imaging by CQ1. The velocity of motility was >60% reduced in *EhPTEN1* gene  
251 silenced strain ( $0.16 \pm 0.07$   $\mu\text{m}/\text{min}$ ) compared to the mock control ( $0.44 \pm 0.08$   $\mu\text{m}/\text{min}$ ) (Fig 7D).

### 252 **Demonstration of phosphatase activity and substrate specificity of EhPTEN1**

253 To see if EhPTEN1 possesses lipid phosphatase activity, bacterial recombinant EhPTEN1 with the  
254 histidine tag at the amino terminus was produced using the pCOLD I *E. coli* expression system.  
255 SDS-PAGE analysis followed by Coomassie Brilliant Blue staining showed that the purified  
256 recombinant EhPTEN1 was apparently homogenous with the predicted molecular mass of 96 kDa  
257 including the histidine tag (S6A Fig). Immunoblot analysis of the purified recombinant protein  
258 using His-Tag antibody confirmed the absence of truncation (S6B Fig). We first examined the  
259 enzymatic activities of recombinant EhPTEN1 using a variety of phosphoinositides (PIs) as  
260 substrates. EhPTEN1 revealed reasonable activity in a broad pH range with maximum activity  
261 obtained at pH 6.0 when the reaction was performed with 50  $\mu\text{M}$  PtdIns(3,4,5)P<sub>3</sub> at 37°C for 40  
262 min (S6C Fig). We then determined the substrate specificity of EhPTEN1, using a panel of di-C8  
263 PIs. EhPTEN1 showed highest activity with PtdIns(3,4,5)P<sub>3</sub> with the apparent specific activity of  
264  $8.18 \pm 0.78$  nmol/min/mg (Fig 11). EhPTEN1 also catalyzed dephosphorylation of PtdIns(3,4)P<sub>2</sub>  
265 and PtdIns(3,5)P<sub>2</sub> with 6 or 3 fold lower specific activities, respectively, compared to that toward  
266 PtdIns(3,4,5)P<sub>3</sub>. The activities against PI monophosphates and PtdIns(4,5)P<sub>2</sub> were relatively low.  
267 All these characteristics are similar to those of human PTEN [33,34]. A comparison of kinetic  
268 parameters of EhPTEN1 reveals a higher affinity towards PtdIns(3,4,5)P<sub>3</sub> ( $K_m = 92.5 \pm 4.72$   $\mu\text{M}$ )  
269 as compared to PtdIns(3,4)P<sub>2</sub> ( $292 \pm 18.8$   $\mu\text{M}$ ) and PtdIns(3,5)P<sub>2</sub> ( $161 \pm 20.1$ ) demonstrating that  
270 in vitro is as well the preferred substrate (Table 1, S8 Fig).

271

272 **Table 1. Kinetic parameters of EhPTEN1.**

| 273 | Substrate               | K <sub>m</sub> (μM) | V <sub>max</sub> (nmoles min <sup>-1</sup> mg <sup>-1</sup> ) | K <sub>cat</sub> (min <sup>-1</sup> ) |
|-----|-------------------------|---------------------|---------------------------------------------------------------|---------------------------------------|
| 274 | PI(3,4)P <sub>2</sub>   | 292 ± 18.8          | 6.02 ± 1.11                                                   | 0.11 ± 0.02                           |
| 275 | PI(3,5)P <sub>2</sub>   | 161 ± 20.1          | 8.40 ± 0.42                                                   | 0.15 ± 0.01                           |
| 276 | PI(3,4,5)P <sub>3</sub> | 92.5 ± 4.72         | 16.9 ± 1.83                                                   | 0.31 ± 0.03                           |

277 Assay was performed as described in Materials and methods in the presence of MOPS, EhPTEN1,  
278 and PtdInsPs. Reaction was conducted at 37°C at pH 6.0. Mean ± SEM of duplicates are shown.

279

### 280 **Demonstration of phospholipid binding of EhPTEN1**

281 The lipid overlay assay using amebic lysates from GFP-EhPTEN1 expressing and mock  
282 transformants showed that EhPTEN1 preferentially bound to PtdIns(3)P, PtdIns(4)P, PtdIns(5)P,  
283 and, to a lesser extent, PtdIns(3,5)P<sub>2</sub>, and PtdIns(4,5)P<sub>2</sub> (S7 Fig). Furthermore, recombinant His-  
284 tagged EhPTEN1 also revealed a similar binding affinity toward a panel of PIs on the membrane,  
285 which is similar to the data given for recombinant human PTEN [35].

286

### 287 **Discussion**

288 PTEN regulates fundamental roles in higher eukaryotes including cell survival, metabolic changes,  
289 cell polarity, and migration [9]. In this study, we have characterized the pivotal functions of  
290 EhPTEN1 in migration, endocytosis, and cellular proliferation in *E. histolytica*. Confocal live  
291 imaging demonstrated the involvement of EhPTEN1 in the initial and intermediate stages of  
292 trogocytosis and phagocytosis. In trogocytosis of a live mammalian cell, EhPTEN1 was enriched  
293 in the region where the trogocytic tunnel was newly formed. Similarly, EhPTEN1 was  
294 accumulated on the cell periphery close to the leading edge of the phagocytic cup during the  
295 internalization of a dead host cell. The recruitment of EhPTEN1 was transient as it gradually

296 became dissociated from the region after the completion of ingestion. These results are in line with  
297 the previous study that showed PTEN was associated with forming IgG conjugated zymosan  
298 containing phagosomes but disappeared once particle ingestion was completed [36]. The  
299 biochemical analysis showed that GFP-EhPTEN1 overexpression caused a reduction in  
300 trogocytosis and phagocytosis. In good agreement with these results, knockdown of EhPTEN1  
301 caused remarkable enhancement in phagocytosis of dead CHO cells while trogocytosis toward live  
302 CHO cells was slightly increased. These results match those observed in earlier studies where  
303 PTEN deficient macrophages displayed enhanced phagocytic ability both in vitro and in vivo,  
304 while overexpression of PTEN significantly inhibited phagocytosis in macrophages [12,37-39]. It  
305 was previously demonstrated that PTEN down-regulates phagocytosis through dephosphorylation  
306 of PtdIns(3,4,5)P<sub>3</sub>, which subsequently affects the downstream events such as the activation of  
307 Rac through the pleckstrin homology domain-containing guanine-nucleotide exchange factor,  
308 Vav1 [12]. The depletion of PTEN in macrophage resulted in elevated PtdIns(3,4,5)P<sub>3</sub> levels,  
309 leading to activation of Vav1 and subsequent activation of Rac1 GTPase, the latter of which  
310 induces F-actin polymerization, which in turn enhances the engulfment of targeted cells [40].  
311 Furthermore, it has been shown that PTEN negatively regulates Fc $\gamma$  receptor-mediated  
312 phagocytosis by repressing the conversion of Rac-bound GDP to GTP downstream [11]. While  
313 PIPs-mediated signaling and downstream effector in *E. histolytica* is not yet well understood, it  
314 has been recently reported that two AGC kinases from *E. histolytica* have the ability to bind  
315 PtdIns(3,4,5)P<sub>3</sub> and are involved in a panel of endocytic events including trogo-, phago-, and  
316 pinocytosis [21]. In addition, it has also been shown that PtdIns(4,5)P<sub>2</sub> is localized on the plasma  
317 membrane whereas PtdIns(3,4,5)P<sub>3</sub> is localized on the phagocytic cup and the extended  
318 pseudopodia in *E. histolytica* trophozoites [41,42]. These observations suggest that the control of

319 PtdIns(3,4,5)P<sub>3</sub> synthesis and decomposition are important for the regulation of endocytic events  
320 in *E. histolytica*. We have clearly demonstrated phosphatase activity and preferred substrate  
321 specificity toward PtdIns(3,4,5)P<sub>3</sub> of EhPTEN1. Hence, it is highly conceivable that EhPTEN1  
322 can regulate the local concentrations of PtdIns(4,5)P<sub>2</sub> and PtdIns(3,4,5)P<sub>3</sub> at the target sites during  
323 trogo- and phagocytic processes. It seems conceivable that EhPTEN1 negatively regulates trogo-  
324 and phagocytosis by reducing the local PtdIns(3,4,5)P<sub>3</sub> concentration, leading to the suppression  
325 of actin-dependent cytoskeletal reorganization needed for trogo- and phagocytosis. Indeed, the  
326 concentration of EhPTEN1 is swiftly reduced on and close to trogo- and phagocytic cups (not-yet-  
327 enclosed) and trogosomes and phagosomes (enclosed) soon after the completion of ingestion.

328 We have shown that EhPTEN1 is involved in receptor-mediated endocytosis and  
329 macropinocytosis of the fluid-phase marker in an opposite fashion as in trogo- and phagocytosis.  
330 GFP-EhPTEN1 overexpression enhanced transferrin uptake while *EhPTEN1* gene silencing  
331 decreased it. It was shown that at least two concentration-dependent mechanisms for transferrin  
332 endocytosis exist in *E. histolytica* [43]: Receptor-mediated endocytosis active at low transferrin  
333 concentrations [44] and receptor-independent internalization at high transferrin concentrations  
334 [45]. As previously demonstrated, receptor-mediated endocytosis of transferrin in *E. histolytica* is  
335 indeed clathrin-mediated [clathrin-mediated endocytosis (CME)] [46], and receptor-mediated  
336 endocytosis is in general clathrin-mediated and actin independent [47]. Unlike trogo- and  
337 phagocytosis, CME is also distinct in that it depends on PtdIns(4,5)P<sub>2</sub> and does not require  
338 PtdIns(3,4,5)P<sub>3</sub> [47,48]. PtdIns(4,5)P<sub>2</sub> binds and recruits several proteins associated with CME  
339 formation thus depleting cells of PtdIns(4,5)P<sub>2</sub> prevents transferrin receptor endocytosis [1,47-49].  
340 Taken together, EhPTEN1 possibly facilitates the transferrin internalization through augmentation  
341 of PtdIns(4,5)P<sub>2</sub> synthesis. Furthermore, EhPTEN1 showed similar phenotypes toward pinocytosis

342 of the fluid-phase marker. As stated above, transferrin, when present at high concentrations, is  
343 internalized by receptor independent fashion in *E. histolytica* [45]. Thus, it is consistent with our  
344 observation that *E. histolytica* internalization of the fluid-phase marker and transferrin by actin-  
345 dependent macropinocytosis (S7 and S8 Movies), also as previously shown [50]. We also  
346 previously showed that EhAGCK2, which preferentially binds PtdIns(3,4,5)P<sub>3</sub> over PtdIns(4,5)P<sub>2</sub>,  
347 is involved in pinocytosis of the fluid-phase marker [21], supporting the actin-dependence of  
348 macropinocytosis. However, it was shown that the local production of PtdIns(4,5)P<sub>2</sub> in the early  
349 stages of macropinocytosis is essential for the formation of ruffles and is partly responsible for the  
350 remodeling of the actin cytoskeleton [51]. Although phagocytosis and macropinocytosis both  
351 construct a cup in an actin-dependent manner, phagocytosis is a receptor-guided zipper-like model  
352 that conforms to particle geometry while macropinocytosis is self-organized with little or no  
353 guidance from receptors and can form in the absence of particles [52]. Moreover, a number of  
354 previous studies have shown that macropinocytosis and phagocytosis are distinct. For instance,  
355 RacC or Rap1 overexpressing cells or profilin-null cells displayed a higher phagocytosis rate but  
356 macropinocytosis was significantly reduced [53-55]. It has been reported previously that deletion  
357 of PTEN in *Dictyostelium discoideum* caused a reduction in fluid uptake [56]. Nevertheless, the  
358 lipid rafts in the plasma membrane of *E. histolytica* is highly enriched with PtdIns(4,5)P<sub>2</sub> [42] and  
359 disruption of lipid rafts with cholesterol-binding agents significantly inhibited fluid-phase  
360 pinocytosis of *E. histolytica* [57]. Altogether, we assume that EhPTEN1 accelerates transient  
361 synthesis of PtdIns(4,5)P<sub>2</sub> on the plasma membrane which in turn facilitates the formation of actin-  
362 associated macropinocytic cup. This study has provide the first observation that PTEN is  
363 differentially involved in multiple actin-related cytoskeletal activities.



364 We have shown that repression of gene expression of *EhPTEN1* caused significant growth  
365 defect. This phenotype can be possibly explained by reduced ability in nutrient uptake.  
366 Furthermore, it was previously demonstrated that the growth defect in *E. histolytica* in low iron  
367 medium was rescued by the addition of iron-loaded holo-transferrin, and that holo-transferrin was  
368 recognized by an amoebic transferrin receptor and endocytosed via clathrin-coated vesicles [44,58].  
369 These data, taken together, underscore the importance of endocytosis of transferrin for the  
370 proliferation of amoebae. Macropinocytosis was previously identified as a mechanism by which  
371 malignant cells satisfy their unique metabolic needs and hence support cancer progression [59]. In  
372 the amoebae, macropinocytosis is the primary and widely used method for feeding [60]. On the  
373 other hand, the downstream signaling molecules that correspond to mammalian PTEN and are  
374 related to cellular proliferation, such as B cell lymphoma 2 associated agonist of cell death (BAD)  
375 and cyclin-dependent kinase inhibitor p27 [5,8], have not yet been identified in *E. histolytica*.  
376 Instead, *E. histolytica* possesses two genes encoding TOR-like proteins by biocomputational  
377 approach [61]. These data may suggest that regulation of amoebic growth by PTEN is distinct in  
378 *E. histolytica*. On the other hand, it was previously shown that loss of PTEN significantly lowered  
379 growth in *D. discoideum*, possibly attributable to mislocalization of myosin II during cytokinesis  
380 [62,63]. Similarly, myosin II mutants caused reduction in growth and multinucleation in *E.*  
381 *histolytica* [64]. These observations likely support the premise that EhPTEN1 regulates amoebic  
382 cell proliferation by regulation of cytokinesis and/or nutrient uptake by macropinocytosis.  
383 Furthermore, the requirement of EhPTEN1 for optimum proliferation indicates that *E. histolytica*  
384 apparently does not possess compensatory mechanisms for the PIPs dysregulation caused by the  
385 loss of EhPTEN1, and thus have posed it as rational drug target.

386 We have shown that EhPTEN1, in two forms of tagged/fusion proteins, GFP-EhPTEN1  
387 and HA-EhPTEN1, enhances cell migration while repression of *EhPTEN1* gene expression causes  
388 inhibition of motility. These observations agree well with the fact that EhPTEN1 was transiently  
389 concentrated in newly formed pseudopods. The GFP-EhPTEN1 distribution in *E. histolytica* is  
390 similar to the localization of mammalian PTEN, which predominantly shows cytosolic localization  
391 and mediates conversion of PtdIns(3,4,5)P<sub>3</sub> to PtdIns(4,5)P<sub>2</sub> through dynamic interaction with the  
392 inner face of the plasma membrane [65,66]. It was also shown that in *D. discoideum* the  
393 localization of PTEN changed in response to the chemoattractant stimulation via increase in  
394 extracellular cAMP. In resting cells, PTEN is uniformly associated with the plasma membrane,  
395 but upon chemoattractant stimulation, PTEN transiently dissociates from the membrane and  
396 diffuses into the cytosol with accumulation at the rear of the chemotaxis cells [67]. These data  
397 suggest that EhPTEN1 is involved in pseudopods formation and motility. In *D. discoideum*, PTEN  
398 was also implicated in cell migration as a positive regulator of motility, because an ameba strain  
399 lacking PTEN showed a reduction in migration speed and defect in chemotactic efficiency due to  
400 disruption of PtdIns(3,4,5)P<sub>3</sub> / PtdIns(4,5)P<sub>2</sub> concentration gradient throughout the cell [68-70]. In  
401 contrast, in mammalian cell types including B cells, glioma cells, and fibroblasts, PTEN was  
402 shown to inhibit migration [71,8]. The behavioral analysis of *D. discoideum* showed that loss of  
403 PTEN caused a reduction in cell motility due to their inability to repress the formation of lateral  
404 pseudopodia that misdirect them, compared with wild-type cells, which produce only one large  
405 pseudopod at a time [68,69]. In addition, loss of PTEN also resulted in dysregulation of myosin II  
406 assembly at the cell cortex, where PTEN prevents the formation of lateral pseudopodia and  
407 promotes cell body contraction and posterior retraction in *D. discoideum* [68,72]. PtdIns(4,5)P<sub>2</sub>,  
408 produced by PTEN, can recruit and activate a wide variety of actin regulatory proteins at the

409 plasma membrane, thereby controlling motility [1,48]. For example, PtdIns(4,5)P<sub>2</sub> activates N-  
410 WASP directly or indirectly through interaction with IQGAP1 which result in promoting actin  
411 polymerization by activation of N-WASP–Arp2/3 complex [1,48,73]. Among them, myosin II and  
412 Arp2/3 complex are conserved in *E. histolytica*, where myosin II plays a critical role in movement  
413 [64,74] and Arp2/3 complex is involved in actin nucleation [75]. Thus, it is conceivable that  
414 EhPTEN1 mediates signaling for pseudopod formation and migration through regulation of  
415 PtdIns(3,4,5)P<sub>3</sub> metabolism.

416 In conclusion, we have shown the biological significance of EhPTEN1 in different forms  
417 of endocytosis including trogocytosis, phagocytosis, pinocytosis, and clathrin-mediated  
418 endocytosis. We have also demonstrated the essentiality of EhPTEN1 in pseudopod formation,  
419 motility, and optimal growth of *E. histolytica*. Taken together, these findings emphasize the  
420 importance of EhPTEN1 in modulating a plethora of functions in *E. histolytica*. Exploring PTEN  
421 functions in *E. histolytica* will hopefully increase our knowledge on the regulation of cellular  
422 processes related to actin remodeling through the PIPs signaling pathway. Also, it will inform the  
423 rational design of novel therapies against eukaryotic pathogens.

424

## 425 **Materials and methods**

### 426 **Identification and comparison of PTEN sequences**

427 Amino acid sequences of PTEN from *E. histolytica* and other organisms were gained from  
428 AmoebaDB (<http://amoebadb.org/amoeba/>) and NCBI (<https://www.ncbi.nlm.nih.gov>)  
429 respectively, and aligned using CLUSTAL W program (<http://clustalw.ddbj.nig.ac.jp/>) to examine  
430 the domain configuration and the key residues for phosphatase activity [76].

### 431 **Organisms, cultivation, and reagents**

432 Trophozoites of *E. histolytica* clonal strains HM-1:IMSS cl6 and G3 strain were cultured  
433 axenically in 6 ml screw-capped Pyrex glass tubes in Diamond's BI-S-33 (BIS) medium at 35.5°C  
434 as described previously [77-79]. CHO cells were grown at 37°C in F12 medium (Invitrogen-Gibco,  
435 New York, U.S.A.) supplemented with 10% fetal bovine serum on a 10-cm-diameter tissue culture  
436 dish (IWAKI, Shizuoka, Japan). *Escherichia coli* BL21 (DE3) strain was purchased from  
437 Invitrogen (California, USA). Ni<sup>2+</sup>-NTA His-bind slurry was obtained from Novagen (Darmstadt,  
438 Germany). Rhodamine B isothiocyanate-Dextran (RITC-Dextran) and anti-GFP antibody were  
439 purchased from Sigma-Aldrich (Missouri, USA). The anti-HA 16B12 monoclonal mouse antibody  
440 was purchased from Biolegend (San Diego, USA). Anti-His antibody was purchased from Cell  
441 Signaling Technology (Massachusetts, USA). Lipofectamine, PLUS reagent, and geneticin (G418)  
442 were purchased from Invitrogen. CellTracker Green, Orange, and Blue were purchased from  
443 Thermo Fisher Scientific (Massachusetts, USA). Restriction enzymes and DNA modifying  
444 enzymes were purchased from New England Biolabs (Massachusetts, USA) unless otherwise  
445 mentioned. Luria Bertani (LB) medium was purchased from BD Difco (New Jersey, USA). Other  
446 common reagents were from Wako Pure Chemical (Tokyo, Japan), unless otherwise stated.

#### 447 **Establishment of *E. histolytica* transformants**

448 To construct a plasmid to express EhPTEN1 fused with HA or GFP tag fused at the amino terminus,  
449 a DNA fragment corresponding to cDNA encoding EhPTEN1 was amplified by polymerase chain  
450 reaction (PCR) from *E. histolytica* cDNA using a pair of primers listed in S2 Table. The PCR-  
451 amplified fragments were digested with XmaI and XhoI and cloned into pEhEx-HA and pEhEx-  
452 GFP vectors [21,22] that had been predigested with XmaI and XhoI, to produce pEhExHA-  
453 EhPTEN1 and pEhExGFP-EhPTEN1. For antisense small RNA-mediated transcriptional  
454 silencing of *EhPTEN1* gene, a 420 bp fragment of the protein coding region of *EhPTEN1* gene,

455 corresponding to the amino terminus of the protein, was amplified by PCR from cDNA with sense  
456 and antisense oligonucleotides containing StuI and SacI restriction sites (S2 Table). The amplified  
457 product was digested with StuI and SacI and ligated into the compatible sites of the double digested  
458 psAP2-Gunma plasmid [80] to synthesize a gene silencing plasmid designated as psAP2-  
459 EhPTEN1. Two plasmids, pEhExHA-EhPTEN1 and pEhExGFP-EhPTEN1, were introduced into  
460 the trophozoites of *E. histolytica* HM-1:IMSS c16 strain, whereas psAP2-EhPTEN1 was  
461 introduced into G3 strain by lipofection as described previously [81]. Transformants were initially  
462 selected in the presence of 1 µg/ml G418 until the drug concentration was gradually increased to  
463 10 µg/ml for the *EhPTEN1* gene silenced stain and 20 µg/ml for the GFP- and HA-EhPTEN1  
464 overexpressing stains. Finally, all transformants were maintained at 10 or 20 µg/ml G418 in BIS  
465 medium.

#### 466 **Reverse transcriptase PCR**

467 Reverse transcriptase PCR was performed to check mRNA levels of EhPTEN1 in EhPTEN1 gene  
468 silenced and control strains. Total RNA was extracted from trophozoites of EhPTEN1 gene  
469 silenced and control strains that were cultivated in the logarithmic phase using TRIZOL reagent  
470 (Life Technologies, California, USA). Approximately one µg of DNase treated total RNA was  
471 used for cDNA synthesis using Superscript III First -Strand Synthesis System (Thermo Fisher  
472 Scientific, Massachusetts, USA) with reverse transcriptase and oligo (dT) primer according to the  
473 manufacture's protocol. Ex Taq PCR system was used to amplify DNA from the cDNA template  
474 using the primer pairs listed in S2 Table. The PCR conditions were as follow: initial denaturation  
475 at 98°C for 10 sec; then 25 cycles at 98°C for 10 sec, 55°C for 30 sec, and 72°C for 20 sec; and a  
476 final extension at 72°C for 7 min. The PCR products obtained were resolved by agarose gel  
477 electrophoresis.

## 478 **Immunoblot analysis**

479 Trophozoites of amoeba transformants expressing HA-EhPTEN1 or GFP-EhPTEN1 grown in the  
480 exponential growth phase were harvested and washed three times with phosphate buffer saline  
481 (PBS). After resuspension in lysis buffer (50 mM Tris-HCl, pH 7.5, 150 mM NaCl, 0.1% Triton-  
482 X 100, 0.5 mg/ml E-64, and protease inhibitor), the trophozoites were kept on ice for 30 min,  
483 followed by centrifugation at  $500 \times g$  for 5 min. Approximately 20  $\mu$ g of the total cell lysates were  
484 separated on 10% SDS-PAGE and subsequently electrotransferred onto nitrocellulose membranes.  
485 The membranes were incubated in 5% non-fat dried milk in Tris-Buffered Saline and Tween-20  
486 (TBST; 50 mM Tris-HCl, pH 8.0, 150 mM NaCl, and 0.05% Tween-20) for 1 hr at room  
487 temperature to block non-specific protein. The blots were reacted with one of the following  
488 primary antibodies diluted as indicated: anti-HA 16B12 monoclonal mouse antibody at a dilution  
489 of 1:1,000, anti-GFP mouse monoclonal antibody (1:100), and anti-CS1 rabbit polyclonal antisera  
490 [82] (1:1,000) at 4°C overnight. The membranes were washed with TBST and further reacted with  
491 horseradish peroxidase-conjugated (HRP) anti-mouse or anti-rabbit IgG antisera (1:10,000) at  
492 room temperature for 1 hr. After washings with TBST, the specific proteins were visualized with  
493 a chemiluminescence HRP Substrate system (Millipore, Massachusetts, USA) using LAS 4000  
494 (Fujifilm Life Science, Cambridge, USA) according to the manufacture's protocol.

## 495 **Live cell imaging**

496 Approximately  $5 \times 10^5$  trophozoites of the transformant strain expressing GFP-EhPTEN1 were  
497 cultured on a 35 mm (in diameter) collagen-coated glass-bottom dish (MatTek Corporation,  
498 Massachusetts, USA) in 3 ml of BIS medium under anaerobic conditions. CHO cells were stained  
499 with BIS medium containing 10  $\mu$ M CellTracker Orange for 40 min followed by washing three  
500 times with PBS. Approximately  $2 \times 10^4$  prestained CHO cells 200  $\mu$ l BIS were gently overlaid to

501 trophozoites grown on the glass-bottom dish as prepared above. The central part of the dish was  
502 then carefully covered with a 1 cm square coverslip and the edge of the coverslip on the slide glass  
503 was sealed with nail polish. Live imaging was performed, images were captured on Zeiss LSM780  
504 confocal microscope, and analyzed by ZEN software (Carl-Zeiss, Oberkochen, Germany).

#### 505 **Indirect immunofluorescence assay (IFA)**

506 Approximately  $5 \times 10^3$  trophozoites in 50  $\mu$ l BIS were transferred to an 8 mm round well on a slide  
507 glass (Matsunami Glass Ind, Osaka, Japan). After 30 min incubation in an anaerobic chamber at  
508 35.5°C,  $5 \times 10^4$  CHO cells that had been pre-stained with 10  $\mu$ M CellTracker Blue in 50  $\mu$ l BIS  
509 were added to the well and the mixture was incubated for 15 min. After removing the medium,  
510 cells were fixed with PBS containing 3.7 % paraformaldehyde at room temperature for 10 min,  
511 and subsequently permeabilized with PBS containing 0.2% Triton 100-X and 1 % bovine serum  
512 albumin (BSA) for 10 min each at room temperature. The cells were then reacted with anti-HA  
513 mouse monoclonal antibody (1:1000) for 1 hr at room temperature. Then the sample was reacted  
514 with Alexa Fluor-488 conjugated anti-mouse IgG (1:1000) antibody (Thermo Fisher,  
515 Massachusetts, USA). The images were then captured using LSM 780 confocal microscope and  
516 analyzed by ZEN software (Carl-Zeiss, Oberkochen, Germany).

#### 517 **Trogocytosis and phagocytosis assay using CQ1**

518 Trophozoites of *E. histolytica* were incubated in BIS containing 10  $\mu$ M CellTracker Blue (Thermo  
519 Fisher) at 35.5°C for 1 hr. After staining, ameba trophozoites were washed 3 times with PBS and  
520 resuspended in OPTI-MEM medium (Thermo Fisher, Massachusetts, USA) containing 15% adult  
521 bovine serum (Sigma Aldrich). Approximately  $2 \times 10^4$  ameba trophozoites were seeded into a well  
522 on a 96-well glass bottom plate (IWAKI, Shizuoka, Japan) and incubated in anaerobic chamber  
523 for 40 min. After incubation, about  $1 \times 10^5$  live or heat killed CHO cells that have been stained with

524 10  $\mu$ M CellTracker Orange were added to the well containing amoebae. The images were taken on  
525 a Confocal Quantitative image cytometer CQ1 (Yokogawa Electric Corporation, Tokyo, Japan)  
526 using 20 $\times$  objective every 10 min for 1 hr. The images were analyzed using CellPathfinder  
527 software (Yokogawa Electric Corporation, Tokyo, Japan) according to the manufacture's protocol.  
528 The multiple parameters were measured to evaluate the efficiency of trophocytosis and  
529 phagocytosis: the average number of internalized CHO cells per amoeba, the combined volume of  
530 internalized CHO cells per amoeba, and the percentage of amebic trophozoites that ingested the  
531 target cells in the whole population.

### 532 **Measurement of fluid-phase and receptor-mediated endocytosis**

533 Approximately  $2.5 \times 10^5$  amebic transformants were incubated in BIS medium containing 2 mg/ml  
534 fluorescent fluid-phase marker RITC dextran at 35°C for indicated time points. The cells were  
535 collected, washed three times with PBS, and resuspended in 250  $\mu$ l of lysis buffer (50 mM Tris-  
536 HCl, pH 7.5, 150 mM NaCl, and 0.1% Triton-X 100). Fluorescence intensity was measured using  
537 a plate reader (SpectraMax Paradigm Multi-Mode, Molecular Devices, California, USA) at an  
538 excitation wavelength of 570 nm and an emission wavelength of 610 nm.

539 Approximately  $2 \times 10^4$  amebic transformants were incubated in BIS containing 20  $\mu$ M  
540 CellTracker Blue (Thermo Fisher) at 35.5°C for 1 hr. After staining, approximately  $10^4$  amebic  
541 transformants resuspended in 100  $\mu$ l of BIS medium were transferred to a well on a 96-well  
542 glass-bottom plate. After incubation at 35.5°C in an anaerobic chamber for 40 min, 0.5 mg/ml of  
543 transferrin conjugate with Alexa Fluor 568 was added to the well and images were acquired by  
544 CQ1 and analyzed as above.

### 545 **Migration (motility) assay**



546 Amoebic trophozoites grown in the logarithmic growth phase were harvested and labelled with 20  
547  $\mu$ M CellTracker Green for 1 hr at 35.5°C. After washing 3 times with PBS, cells were transferred  
548 to a well on a 96-well glass-bottom plate and time lapse images were captured on CQ1. The  
549 motility of the cells was measured using CellPathfinder software.

#### 550 **Quantitative real-time (qRT) PCR**

551 The relative levels of mRNA of *EhPTEN1* gene and RNA polymerase II gene, as an internal  
552 standard, were measured by qRT-PCR. PCR reaction was prepared using Fast SYBR Master Mix  
553 (Applied Biosystems, California, USA) with 100 ng cDNA and a primer set shown in S1 Table.  
554 PCR was conducted using the StepOne Plus Real-Time PCR system (Applied Biosystems,  
555 California, USA) with the following cycling conditions: an initial step of denaturation at 95°C for  
556 20 sec, followed by 40 cycles of denaturation at 95°C for 3 sec, annealing and extension at 60°C  
557 for 30 sec. The mRNA expression level of *EhPTEN1* gene in the transformants was expressed as  
558 relative to that in the control transfected with psAP2.

#### 559 **Growth assay of *E. histolytica* trophozoites**

560 Approximately  $10^4$  trophozoites of *E. histolytica* G3 strain transformed with psAP2-EhPTEN1 and  
561 psAP2 (control), grown in the logarithmic phase, were inoculated into 6 ml of fresh BI-S-33  
562 medium containing 10  $\mu$ g/mL G418, and the parasites were counted every 24 hr on a  
563 hemocytometer.

#### 564 **Production of EhPTEN1 recombinant protein**

565 To construct the plasmid for the production of recombinant EhPTEN1 containing a histidine-tag  
566 at the amino terminus, the full-length protein coding sequence of *EhPTEN1* gene was amplified  
567 by PCR using oligonucleotide primers listed in S2 Table. PCR was performed with PrimeSTAR  
568 Max DNA polymerase (Takara Bio Inc, Shiga, Japan) with the following parameters: initial

569 incubation at 95°C for 1 min; followed by 30 cycles of denaturation at 98°C for 10 sec; annealing  
570 at 55°C for 5 sec; and elongation at 72°C for 15 sec; and a final extension at 72°C for 30 sec. The  
571 PCR fragment was digested with *Bam*HI and *Sal*I and ligated into *Bam*HI and *Sal*I double digested  
572 pCOLD-1 vector (Takara Bio Inc, Shiga, Japan) to produce pCOLD1-EhPTEN1 plasmid. The  
573 pCOLD-1-EhPTEN1 was introduced into *E. coli* BL21 (DE3) cells by heat shock at 42°C for 45  
574 sec. *E. coli* BL21 (DE3) strain harboring pCOLD-1-EhPTEN1 was grown at 37°C in 50 ml of LB  
575 medium (BD Difco, New Jersey, USA) in the presence of 100 µg/ml ampicillin. The overnight  
576 culture was used to inoculate 500 ml of fresh medium, and the culture was further continued at  
577 37°C with shaking at 220 rpm for approximately 2 hr. When A<sub>600</sub> absorbance reached 0.6, then  
578 1mM of isopropyl β-D-thio galactopyranoside (IPTG) was added, and cultivation was continued  
579 for another 24 hr at 15°C. The *E. coli* cells from the induced culture were harvested by  
580 centrifugation at 75,000 rpm for 20 min at 4°C. The cell pellet was washed three times with PBS,  
581 re-suspended in 30 ml of the lysis buffer (50 mM Tris-HCl, pH 8.0, 300 mM NaCl, and 0.1%  
582 Triton X-100) containing 100 µg/ml lysozyme, and 1 mM phenylmethyl sulfonyl fluoride (PMSF),  
583 and incubated at room temperature for 30 min. After incubation, the mixture was sonicated on ice  
584 and centrifuged at 13,000 rpm for 20 min at 4°C. The supernatant was mixed with 1 ml of 50%  
585 Ni<sup>2+</sup>-NTA His-bind resin (Qiagen, Hilden, Germany), incubated for 1 hr at 4°C with mild rotatory  
586 shaking. The resin that recombinant His-EhPTEN1 bound was washed in a disposal column three  
587 times with 5 ml of lysis buffer containing 10-30 mM of imidazole. Bound proteins were eluted  
588 with 3 ml each of lysis buffer containing 100-300 mM imidazole to obtain recombinant EhPTEN1.  
589 The integrity and the purity of the recombinant protein were confirmed with 10% SDS-PAGE  
590 analysis, followed by Coomassie Brilliant Blue staining. Then the protein was concentrated, and  
591 the buffer was replaced with 50 mM Tris-HCl, 150 mM NaCl, pH 8.0 using Amicon Ultra 50K

592 centrifugal device (Millipore, Massachusetts, USA). The protein was stored at -30 °C with 50%  
593 glycerol in small aliquots until further use.

#### 594 **Lipid phosphatase assay**

595 EhPTEN1 enzymatic activity was determined by the method previously described [83]. Di-C8  
596 phosphatidylinositol phosphate(s) (PIPs) (Echelon Bioscience, Salt Laken City, USA) were  
597 dissolved in 100 mM MOPS, pH 6.0, solution, flash frozen in liquid nitrogen, and stored at -20°C  
598 between uses. For determination of pH optimum, the following buffers were used, 100 mM acetate  
599 buffer (pH 4.0, pH 4.5, pH 5.0, pH 5.5), 100 mM MOPS buffer (pH 6.0, pH 6.5, pH 7.0), and 100  
600 mM Tris-HCl (pH 7.5, pH 8.0, pH 8.5, pH 9.0). For determination of substrate specificity, a  
601 reaction mixture was composed of 25 µl of 100 mM MOPS pH 6.0 containing 5 µg of recombinant  
602 EhPTEN1 and 100 µM PIPs. The reaction was carried out at 37°C for 40 min and the produced  
603 phosphate was measured using Malachite Green Reagent (Cell Signaling technology,  
604 Massachusetts, USA). After incubation for 15 min at room temperature, the absorbance was  
605 measured at a wavelength of 630 nm. The Lineweaver Burk Plot was used to calculate the kinetic  
606 parameters of EhPTEN1.

#### 607 **Lipid membrane overlay assay**

608 Approximately  $6 \times 10^6$  trophozoites of GFP-EhPTEN1 expressing strain were harvested, washed  
609 with PBS, and concentrated by centrifugation. Approximately one hundred µl of lysis buffer (50  
610 mM Tris-HCl, pH 7.5 150 mM NaCl, and 0.1 % Triton X-100, 1× complete mini, and 0.5 mg/ml  
611 E64) was added to the cell pellet. The mixture was incubated on ice for 30 min and centrifuged at  
612 13000 rpm for 5 min. The supernatant was collected and used as the total lysate. GFP-EhPTEN1  
613 was immunoprecipitated using GFP-Trap Agarose Kit (ChromoTek, Planegg, Germany)  
614 according to the manufacturer's instruction, eluted, and confirmed by immunoblot. Lipid

615 membranes on which a panel of phospholipids were immobilized (PIP strips: P-6001, Echelon  
616 Bioscience, Salt Laken City, USA) were blocked with 1% fat free BSA in PBS-T (PBS containing  
617 0.05% Tween 20) for 1 hr at room temperature. The membranes were then incubated with 2 ml of  
618 lipid binding solution (1% fat free BSA in PBS-T, 1x complete mini, 0.05 mg/ml E64, 20  $\mu$ l of  
619 eluted lysate) for 3 hr at 4C. After the membrane were washed twice with PBS-T at 4°C, they were  
620 reacted with anti-GFP at 1:100 dilution with PBS-T containing 1% fat free BSA (PBS-TB) in for  
621 3 hr at 4C. After incubation with the first antibody, the membranes were further reacted with HRP  
622 conjugated anti-mouse IgG rabbit antiserum at 1:10,000 dilution with PBS-TB in at 4°C for 1 hr.  
623 The membranes were washed three times with PBS-T at 4°C and the specific proteins were  
624 visualized with a chemiluminescence HRP substrate system (Millipore, Massachusetts, USA)  
625 using LAS 4000 (Fujifilm Life Science, Cambridge, USA) according to the manufactures' protocol.  
626 Recombinant EhPTEN1 protein was also used except that 1  $\mu$ g/ml of recombinant protein were  
627 incubated on the membrane over night at 4C and anti-His antibody was used as the first antibody  
628 with a dilution of 1:1,000.

629

### 630 **Acknowledgments**

631 We thank all members of Nozaki lab, particularly Herbert J. Santos, for technical assistance and  
632 valuable discussions, and Arif Nurkanto, Emi Mazaki, Kumiko Shibata, Mihoko Imada, and Ratna  
633 Wahyuni for all the help and advice.

634

### 635 **Figure legends**

636 **Fig 1. Structural features and sequence alignments of PTEN in *Entameoba histolytica*. (A)**

637 Domain organization of PTEN from human and *E. histolytica*. PDM [PtdIns(4,5)P<sub>2</sub>-binding motif],

638 Ptase (Phosphatase tensin-type domain), C2 (C2 tensin-type domain), DUF547 (Domain of  
639 unknown function), PDZ-BM (PDZ-binding motif), PEST (proline, glutamine, serine, threonine  
640 sequence), red triangle indicates the nuclear localization sequence. **(B)** Relative mRNA expression  
641 of PTEN homologs in *E. histolytica* trophozoites HM1: IMSS cl6 and G3 strains. **(C)** Multiple  
642 amino acid sequence alignment of human PTEN (P60484), *D. discoideum* PTEN (Q8T9S), and  
643 EhPTEN1 (XP\_653141.2) was constructed by using clustalw algorithm  
644 (<http://clustalw.ddbj.nig.ac.jp>). PTEN phosphatase domain and C2 domain are shown with blue  
645 and yellow backgrounds, respectively. The green rectangle corresponds to the PtdIns(4,5)P<sub>2</sub>-  
646 binding motif (PDM domain). Amino acid residues implicated for PtdIns(3,4,5)P<sub>3</sub> catalysis are  
647 marked with a red rectangle. Cytosolic localization signal and residues important for TI loop  
648 formation are indicated in black and blue lines, respectively. Note that for human PTEN, only the  
649 amino terminal part is shown.

650 **Fig 2. Expression and localization of GFP-EhPTEN1 in motile trophozoites.** **(A)** Immunoblot  
651 of GFP-EhPTEN1 and mock control in *E. histolytica* transformants. Approximately 30 µg of total  
652 lysates from mock-transfected control (mock) and GFP-EhPTEN1-expressing transformant (GFP-  
653 EhPTEN1) were subjected to SDS-PAGE and immunoblot analysis using anti-GFP antibody and  
654 anti-CS1 antibody. Arrow indicates GFP-EhPTEN1. **(B)** Live imaging montage showing a time  
655 series of motile trophozoites expressing GFP-EhPTEN1. The pseudopodal localization of GFP-  
656 EhPTEN1 is indicated by white arrow. The line intensity plot shows GFP-EhPTEN1 intensity in  
657 pseudopods vs. cytoplasm with the distance. (Scale bar, 10 µm) **(C)** Relative fluorescence  
658 intensities were quantified in the pseudopod regions of GFP-EhPTEN1 and mock control  
659 expressing trophozoites then normalized to the fluorescence intensities in the total cells. Data  
660 points in the graph show the mean and error bars represent standard deviation for 30 cells.

661 Statistical significance was examined with t-test (\*\*P<0.001). **(D)** Cell motility of mock and  
662 GFP-EhPTEN1 transfected strains. Time-lapse images of the transformant trophozoites were  
663 collected every sec for 5 min using CQ1 and 30 cells were selected randomly for analysis by  
664 CellPathfinder software. The experiments were performed three times independently. Statistical  
665 significance was examined with Dunnet test (\*\*P< 0.05).

666 **Fig 3. Localization of GFP-EhPTEN1 during trogocytosis.** **(A)** Time series montage showing  
667 the localization of GFP-EhPTEN1 during trogocytosis of live CHO cells by amoebic trophozoites.  
668 The site of trogocytosis is marked with arrow. (Scale bar, 10  $\mu$ m). **(B)** Analysis of GFP-EhPTEN1  
669 intensity along the line drawn at the initial phase of CHO internalization soon after attachment.  
670 **(C)** The plot showing the intensity of GFP-EhPTEN1 along the line drawn reveals its enrichment  
671 in the tunnel formed during amoebic trogocytosis. **(D)** The graph shows the intensity of GFP-  
672 EhPTEN1 at the late phase of trogocytosis soon after closure of the trogocytic cup **(E)** The graph  
673 shows the intensity of GFP-EhPTEN1 after the closure of the trogocytic cup.

674 **Fig 4. Localization of GFP-EhPTEN1 phagocytosis of pre-killed CHO cells.** **(A)** Montage of  
675 live trophozoite expressing GFP-EhPTEN1 ingesting pre-killed CHO cells by phagocytosis. (Scale  
676 bar, 10  $\mu$ m). **(B)** Analysis of intensity of GFP-EhPTEN1 across the phagocytic cup along the line  
677 drawn. **(C)** The plot showing the intensity of GFP-EhPTEN1 along the line drawn across the newly  
678 formed phagosome. **(D)** The graph shows the intensity of GFP-EhPTEN1 after phagosome  
679 maturation.

680 **Fig 5. Effect of GFP-EhPTEN1 expression on trogocytosis.** **(A)** Trophozoites of mock  
681 transfected and GFP-EhPTEN1 expressing strains were incubated with live CHO cells that have  
682 been stained with CellTracker Orange to evaluate trogocytosis. The images were taken on CQ1 as  
683 described in the materials and methods and analyzed to calculate the average numbers of CHO

684 cell-containing trophosomes per amoeba. **(B)** The volume of the ingested CHO cells was calculated  
685 using three-dimensionally reconstituted data. **(C)** The percentage of amoeba trophozoites that  
686 ingested live CHO cells. Experiments were conducted three times independently in triplicates and  
687 a representative data set is shown. Statistical significance was examined with t-test (\* $P < 0.05$ ,  
688 \*\* $P < 0.01$ ). Error bars indicating standard deviation.

689 **Fig 6. Effect of GFP-EhPTEN1 expression on phagocytosis.** **(A)** Trophozoites of mock  
690 transfected and GFP-EhPTEN1 expressing strains were incubated with heat killed CHO cells that  
691 have been stained with CellTracker Orange to evaluate phagocytosis. The images were taken on  
692 CQ1 as described in the materials and methods and analyzed to calculate the average numbers of  
693 CHO cell-containing phagosomes per amoeba. **(B)** The volume of the ingested CHO cells was  
694 calculated using three-dimensionally reconstituted data. **(C)** The percentage of amoeba  
695 trophozoites that ingested pre-killed CHO cells. Experiments were conducted three times  
696 independently in triplicates and a representative data set is shown. Statistical significance was  
697 examined with t-test (\* $P < 0.05$ ). Error bars indicating standard deviation.

698 **Fig 7. Establishment and phenotypes of EhPTEN1 gene silenced strain.** **(A)** Confirmation of  
699 gene silencing by RT-PCR analysis of mock transfected and EhPTEN1 gene silenced strain (gs)  
700 strain. Transcripts of EhPTEN1 and RNA polymerase II genes were amplified by RT-PCR from  
701 cDNA isolated from the transformants and examined by agarose gel electrophoresis. **(B)** Relative  
702 levels of EhPTEN1 transcripts by qRT-PCR analysis in EhPTEN1gs and mock strains. The  
703 transcript levels were normalized against RNA polymerase II and are shown in percentage relative  
704 to the transcript level in mock control strain. Data shown are the means  $\pm$  standard deviations of  
705 two biological replicates. Statistical comparison is made by t-test (\*\* $P < 0.01$ ). **(C)** Growth kinetics  
706 of mock and EhPTEN1gs transformants s during 96 h incubation in BI-S-33 medium. Data shown

707 are the means  $\pm$  standard deviations of three biological replicates. Statistical comparison is made  
708 by t-test (\* $P < 0.05$ , \*\* $P < 0.01$ , \*\*\* $P < 0.001$ ). **(D)** Cell motility of mock transfected and EhPTEN1  
709 gene silenced strains. The indicated transformant trophozoites were pre-stained with CellTracker  
710 green and time-lapse images were collected every sec for 2 min using CQ1 and 30 cells were  
711 selected randomly for analysis by CellPathfinder software. The experiments were performed three  
712 times independently. Statistical significance was examined with Dunnet test (\*\* $P < 0.05$ ).

713 **Fig 8. The effect of gene silencing of EhPTEN1 on trogocytosis and phagocytosis. (A, C, and**  
714 **E)** Trophozoites of mock and EhPTEN1gs strains were prestained with CellTracker Blue were  
715 incubated with live CHO cells that have been stained with CellTracker Orange to evaluate  
716 trogocytosis. The images were taken on CQ1 as described in the materials and methods. **(B, D,**  
717 **and F)** Trophozoites of mock and EhPTEN1gs strains were prestained with CellTracker Blue were  
718 incubated with heat killed CHO cells that have been stained with CellTracker Orange to evaluate  
719 phagocytosis. The images were taken on CQ1 as described in the materials and methods. **(A)** The  
720 average numbers of CHO cell-containing trogosomes per amoeba. **(B)** The average numbers of  
721 CHO cell-containing phagosomes per amoeba. **(C)** The volume of the trogosomes were calculated  
722 using three-dimensionally reconstituted data. **(D)** The volume of the phagosomes were calculated  
723 using three-dimensionally reconstituted data. **(E)** The percentage of amoeba trophozoites that  
724 ingested live CHO cells. **(F)** The percentage of amoeba trophozoites that ingested pre-killed CHO  
725 cells. Experiments were conducted three times independently in triplicates. Statistical significance  
726 was examined with t-test (\* $P < 0.05$ , \*\* $P < 0.01$ ). Error bars indicating standard deviation.

727 **Fig 9. Effect of EhPTEN1 on pinocytosis. (A)** The effect of GFP-EhPTEN1 expression on  
728 pinocytosis. Trophozoites of mock transfected and GFP-EhPTEN1 expressing strains were  
729 assayed for RITC dextran uptake in a time-dependent manner. **(B)** The effect of pinocytosis upon



730 EhPTEN1 silencing in comparison to mock control. Trophozoites of mock and EhPTEN1gs strains  
731 were incubated in BI-S-33 medium containing RITC dextran and assayed for its uptake for  
732 indicated time points. Experiments were conducted three times independently and statistical  
733 significance was examined with t-test (\*P<0.05). Error bars indicating standard errors.

734 **Fig 10. Effect of EhPTEN1 on endocytosis.** (A) The effect of GFP-EhPTEN1 expression on  
735 endocytosis. Trophozoites of mock transfected and GFP-EhPTEN1 expressing strains were  
736 incubated in BI-S-33 medium containing transferrin and images were taken every 10 min for 1 hr  
737 by CQ1 as described in the materials and methods. The volume of endosomes was calculated using  
738 three-dimensionally reconstituted data. (B) The effect of EhPTEN1 gene silencing on endocytosis.  
739 Images of mock and EhPTEN1gs transformant trophozoites that have been co-cultivated with  
740 transferrin were taken every 10 min for 1 hr by CQ1 as described in the materials and methods.  
741 The volume of endosomes was calculated using three-dimensionally reconstituted data. All  
742 experiments were conducted three times independently and statistical significance was examined  
743 with t-test (\*P<0.05). Error bars indicating standard errors.

744 **Fig 11. Substrate specificity and enzymatic activity of EhPTEN1.** Determination of Eh-PTEN1  
745 Specific Activity. The specific activity of bacterial recombinant Eh-PTEN1 fusion protein toward  
746 a panel of synthetic di-C8-phosphoinositide substrates was determined using a malachite green-  
747 based assay for inorganic phosphate. Reactions were carried out in a volume of 25  $\mu$ l for 40 min  
748 at 37°C, then terminated by the addition of 100  $\mu$ l of malachite green reagent as described in the  
749 materials and methods. The absorbance at 630 nm was measured and phosphate released was  
750 quantified by comparison to a standard curve of inorganic phosphate. The means  $\pm$  standard  
751 deviations of three independent experiments performed in duplicates are shown.

752

753 **Legends for Supplementary figures**

754 **S1 Fig. Live imaging montage showing localization of GFP-EhPTEN1 in normal motile**  
755 **trophozoites. (A-B)** Montage showing a time series of motile trophozoites expressing GFP-  
756 EhPTEN1 in left panels. The pseudopodal localization of GFP-EhPTEN1 is indicated by white  
757 arrow. The right panels show the fluorescence intensity of GFP-EhPTEN1 across the amoebic  
758 trophozoites. (Scale bar, 10  $\mu$ m).

759 **S2 Fig. Live imaging montage showing localization of GFP mock in normal motile**  
760 **trophozoites. (A-C)** Montage showing a time series of motile trophozoites expressing GFP in left  
761 panels. The pseudopods in different time frames have been analyzed for GFP intensity along the  
762 marked arrow line. The right panels show the fluorescence intensity of GFP across the amoebic  
763 trophozoites. (Scale bar, 10  $\mu$ m).

764 **S3 Fig. Expression and localization of HA-EhPTEN1. (A)** Immunoblot analysis of HA-  
765 EhPTEN1 in *E. histolytica* transformants. Approximately 30  $\mu$ g of total lysates from mock-  
766 transfected control (mock) and HA-EhPTEN1-expressing transformant (HA-EhPTEN1) were  
767 subjected to SDS-PAGE and immunoblot analysis using anti-HA antibody. EhCS1 (Cysteine  
768 synthase 1) was detected by anti-CS1 antiserum as a loading control. Arrow indicates HA-  
769 EhPTEN1. **(B)** Localization of HA-EhPTEN1 in a quiescent state. Immunofluorescence assay  
770 (IFA) micrographs of HA-EhPTEN1 expressing trophozoites stained with anti-HA antibody  
771 (green). (Scale bar, 5  $\mu$ m). **(C)** The line intensity plot shows HA-EhPTEN1 intensity in pseudopods  
772 vs. cytoplasm with the distance.

773 **S4 Fig. Localization of GFP mock during phagocytosis. (A)** Montage of live trophozoite  
774 expressing GFP ingesting pre-killed CHO cells by phagocytosis. (Scale bar, 10  $\mu$ m). **(B-C)**  
775 Analysis of intensity of GFP across the phagocytic cup along the line drawn.

776 **S5 Fig. Evaluation of gene expression by RT-PCR analysis of *EhPTEN1* gene silenced**  
777 **transformant.** The steady-state levels of transcripts of *E. histolytica* PTEN isoforms and *EhRNA*  
778 *pol II* genes were measured in mock and EhPTEN1gs transformants trophozoites. cDNA from the  
779 generated cell lines was subjected to 25 cycles of PCR using specific primers mentioned in S2  
780 Table. RNA polymerase II served as a control.

781 **S6 Fig. Expression and purification of EhPTEN1 in *E. coli*.** (A) Expression and purification of  
782 recombinant EhPTEN1. Protein samples at each step of purification were subjected to 10% SDS-  
783 PAGE and the gel was stained with Coomassie Brilliant Blue. (B) Immunoblot analysis of purified  
784 recombinant EhPTEN1 using anti-His-tag antibody. The recombinant EhPTEN1 in the supernatant  
785 was visualized after longer exposure. (C) Optimum pH of EhPTEN1. Enzyme specific activity of  
786 recombinant EhPTEN1 was measured at various pHs indicated in the figure. The means  $\pm$  standard  
787 errors of three independent experiments are shown.

788 **S7 Fig. Lipid binding specificity of EhPTEN1.** Lipid binding specificity of EhPTEN1 observed  
789 by lipid overlay assay. A panel of PIPs and phospholipid spotted in nitrocellulose membrane was  
790 incubated with total lysates from GFP-EhPTEN1 and mock expressing transformants, and  
791 recombinant His-EhPTEN1. LPA, lysophosphatidic acid; LPC, lysophosphocholine; PE  
792 phosphatidylethanolamine; PC, phosphatidylcholine; S1P, sphingosine-1-phosphate, PA,  
793 phosphatidic acid; PS, phosphatidylserine.

794 **S8 Fig. Kinetic analysis of EhPTEN1 phosphatase activity.** (A) Saturation Kinetics for  
795 EhPTEN1 against PI(3,4,5)P<sub>3</sub>, PI(3,5)P<sub>2</sub>, and PI(3,4)P<sub>2</sub>. Varying amount of PI(3,4,5)P<sub>3</sub>, PI(3,5)P<sub>2</sub>,  
796 and PI(3,4)P<sub>2</sub> were mixed with EhPTEN1 recombinant protein and phosphate release was  
797 measured by a malachite green binding assay as mentioned in the materials and methods. (B)  
798 Double reciprocal plots of the recombinant EhPTEN1. The enzymatic activities were determined

799 with various concentration of PI(3,4,5)P<sub>3</sub>, PI(3,5)P<sub>2</sub>, and PI(3,4)P<sub>2</sub>. Data are shown in means ±  
800 standard deviations of duplicate analysis.

801

802 **S1 Table. Percentage of amino acid identity among *E. histolytica* PTEN isoforms and Human**  
803 **PTEN by ClustalW multiple sequence alignment score.**

804 **S2 Table. List of primers used in this study. Restriction site marked by bold letter.**

805

806 **S\_1 Movie. Live cell imaging showing localization of GFP-EhPTEN1 in the cytoplasm and**  
807 **pseudopod like structures formed by trophozoites.** The trophozoites expressing GFP-EhPTEN1  
808 proteins were seeded onto 3.5 cm diameter glass bottom dish and then observed using Carl Zeiss  
809 LSM780 confocal microscope. (Scale bar, 10 μm)

810 **S\_2 Movie. Live cell imaging showing localization of GFP in motile trophozoites.** The  
811 trophozoites expressing GFP mock were seeded onto 3.5 cm diameter glass bottom dish and then  
812 observed using Carl Zeiss LSM780 confocal microscope. (Scale bar, 10 μm)

813 **S\_3 Movie. Live cell imaging showing localization of GFP-EhPTEN1 during trogocytosis.**  
814 The trophozoites expressing GFP-EhPTEN1 proteins were co-cultured with CellTracker Orange  
815 stained live CHO cells onto 3.5 cm diameter glass bottom dish and then observed using Carl Zeiss  
816 LSM780 confocal microscope. (Scale bar, 10 μm).

817 **S\_4 Movie. Live cell imaging showing localization of GFP-EhPTEN1 during phagocytosis.**  
818 The trophozoites expressing GFP-EhPTEN-1 proteins were co-cultured with CellTracker Orange  
819 stained pre-killed CHO cells onto 3.5 cm diameter glass bottom dish and then observed using Carl  
820 Zeiss LSM780 confocal microscope. (Scale bar, 10 μm).

821 **S\_5 Movie. Live cell imaging showing localization of GFP during phagocytosis.** The  
822 trophozoites expressing GFP mock were co-cultured with CellTracker Orange stained pre-killed  
823 CHO cells onto 3.5 cm diameter glass bottom dish and then observed using Carl Zeiss LSM780  
824 confocal microscope. (Scale bar, 10  $\mu$ m).

825

## 826 **References**

- 827 1. Di Paolo G, De Camilli P. Phosphoinositides in cell regulation and membrane dynamics.  
828 Nature. 2006;12;443(7112):651-7.
- 829 2. Balla T. Phosphoinositides: Tiny lipids with giant impact on cell regulation. *Physiol Rev*.  
830 2013;93(3):1019–137.
- 831 3. Sasaki T, Takasuga S, Sasaki J, Kofuji S, Eguchi S, Yamazaki M, et al. Mammalian  
832 phosphoinositide kinases and phosphatases. *Prog Lipid Res*. 2009;48(6):307–43.
- 833 4. Maehama T, Dixon JE. The tumor suppressor, PTEN/MMAC1, dephosphorylates the lipid  
834 second messenger, phosphatidylinositol 3,4,5-trisphosphate. *J Biol Chem*. 1998 May  
835 29;273(22):13375-8.
- 836 5. Chalhoub N, Baker SJ. PTEN and the PI3-Kinase Pathway in Cancer. *Annu Rev Pathol*  
837 *Mech Dis*. 2009 Feb 1;4(1):127–50.
- 838 6. Maehama T, Taylor GS, Dixon JE. PTEN and myotubularin: novel phosphoinositide  
839 phosphatases. *Annu Rev Biochem*. 2001;70:247-79.
- 840 7. Martin-Belmonte F, Gassama A, Datta A, Yu W, Rescher U, Gerke V, et al. PTEN-  
841 Mediated Apical Segregation of Phosphoinositides Controls Epithelial Morphogenesis  
842 through Cdc42. *Cell*. 2007 Jan 26;128(2):383-97.

- 843 8. Song MS, Salmena L, Pandolfi PP. The functions and regulation of the PTEN tumour  
844 suppressor. *Nat Rev Mol Cell Biol.* 2012;13(5):283–96.
- 845 9. Lee YR, Chen M, Pandolfi PP. The functions and regulation of the PTEN tumour  
846 suppressor: new modes and prospects. *Nat Rev Mol Cell Biol.* 2018;19(9):547–62.
- 847 10. Liaw D, Marsh DJ, Li J, Dahia PL, Wang SI, Zheng Z, et al. Germline mutations of the  
848 PTEN gene in Cowden disease, an inherited breast and thyroid cancer syndrome. *Nat Genet.*  
849 1997 May;16(1):64-7.
- 850 11. Kim JS, Peng X, De PK, Geahlen RL, Durden DL. PTEN controls immunoreceptor  
851 (immunoreceptor tyrosine-based activation motif) signaling and the activation of Rac.  
852 *Blood.* 2002;99(2):694–7.
- 853 12. Cao X, Wei G, Fang H, Guo J, Weinstein M, Marsh CB, et al. The Inositol 3-Phosphatase  
854 PTEN Negatively Regulates Fcγ Receptor Signaling, but Supports Toll-Like Receptor 4  
855 Signaling in Murine Peritoneal Macrophages. *J Immunol.* 2004;172(8):4851–7.
- 856 13. Ximenez C, Moran P, Rojas L, Valadez A, Gomez A. Reassessment of the epidemiology  
857 of amebiasis: state of the art. *Infect Genet Evol.* 2009; 9:1023–1032.
- 858 14. Haque R, Huston CD, Hughes M, Houpt E, Petri WA Jr. Amebiasis. *N Engl J Med.* 2003  
859 Apr 17;348(16):1565-73. doi: 10.1056/NEJMra022710
- 860 15. Stanley SL Jr . Amoebiasis. *Lancet.* 2003; 361: 1025–1034. doi: 10.1016/S0140-  
861 6736(03)12830-9.
- 862 16. Ralston KS, Petri WA Jr. Tissue destruction and invasion by *Entamoeba histolytica*. *Trends*  
863 *Parasitol.* 2011 Jun;27(6):254-63. doi: 10.1016/j.pt.2011.02.006

- 864 17. Ralston KS, Solga MD, MacKey-Lawrence NM, Somlata, Bhattacharya A, Petri WA.  
865 Trogocytosis by *Entamoeba histolytica* contributes to cell killing and tissue invasion.  
866 Nature. 2014;508(7497):526–30.
- 867 18. Marie C, Petri WA. Regulation of virulence of *Entamoeba histolytica*. Annu Rev Microbiol.  
868 2014;68:493–520.
- 869 19. Nakada-Tsukui K, Nozaki T. Immune response of amebiasis and immune evasion by  
870 *Entamoeba histolytica*. Front Immunol. 2016;7(MAY):1–13.
- 871 20. Nakada-Tsukui K, Watanabe N, Maehama T, Nozaki T. Phosphatidylinositol Kinases and  
872 Phosphatases in *Entamoeba histolytica*. Front Cell Infect Microbiol. 2019;9(JUN):1–36.
- 873 21. Somlata, Nakada-Tsukui K, Nozaki T. AGC family kinase 1 participates in trogocytosis  
874 but not in phagocytosis in *Entamoeba histolytica*. Nat Commun. 2017;8(1):1–12.
- 875 22. Nakada-Tsukui K, Okada H, Mitra BN, Nozaki T. Phosphatidylinositol-phosphates  
876 mediate cytoskeletal reorganization during phagocytosis via a unique modular protein  
877 consisting of RhoGEF/DH and FYVE domains in the parasitic protozoon *Entamoeba*  
878 *histolytica*. Cell Microbiol. 2009;11(10):1471–91.
- 879 23. Watanabe N, Nakada-Tsukui K, Nozaki T. Two isoforms of phosphatidylinositol 3-  
880 phosphate-binding sorting nexins play distinct roles in trogocytosis in *Entamoeba*  
881 *histolytica*. Cell Microbiol. 2020;22(3):1–16.
- 882 24. Penuliar GM, Nakada-Tsukui K, Nozaki T. Phenotypic and transcriptional profiling in  
883 *Entamoeba histolytica* reveal costs to fitness and adaptive responses associated with  
884 metronidazole resistance. Front Microbiol. 2015;6(MAY):1–17.
- 885 25. Nakada-Tsukui K, Tsuboi K, Furukawa A, Yamada Y, Nozaki T. A novel class of cysteine  
886 protease receptors that mediate lysosomal transport. Cell Microbiol. 2012;14:1299–1317.

- 887 26. Furukawa A, Nakada-Tsukui K, Nozaki T. Novel transmembrane receptor involved in  
888 phagosome transport of lysozymes and  $\beta$ -hexosaminidase in the enteric protozoan  
889 *Entamoeba histolytica*. PLoS Pathog. 2012;8(2). doi: 10.1371/journal.ppat.1002539
- 890 27. Lee JO, Yang H, Georgescu MM, Cristofano A Di, Maehama T, Shi Y, et al. Crystal  
891 structure of the PTEN tumor suppressor: Implications for its phosphoinositide phosphatase  
892 activity and membrane association. Cell. 1999;99(3):323–34.
- 893 28. Yoshioka D, Fukushima S, Koteishi H, Okuno D, Ide T, Matsuoka S, et al. Single-molecule  
894 imaging of PI(4,5)P2 and PTEN in vitro reveals a positive feedback mechanism for PTEN  
895 membrane binding. Commun Biol. 2020;3(1):1–14.
- 896 29. Denning G, Jean-Joseph B, Prince C, Durden DL, Vogt PK. A short N-terminal sequence  
897 of PTEN controls cytoplasmic localization and is required for suppression of cell growth.  
898 Oncogene. 2007 Jun 7;26(27):3930–40.
- 899 30. Georgescu MM, Kirsch KH, Kaloudis P, Yang H, Pavletich NP, Hanafusa H. Stabilization  
900 and productive positioning roles of the C2 domain of PTEN tumor suppressor. Cancer Res.  
901 2000;60(24):7033–8.
- 902 31. Masson GR, Williams RL. Structural mechanisms of PTEN regulation. Cold Spring Harb  
903 Perspect Med. 2020;10(3). doi: 10.1101/cshperspect.a036152
- 904 32. Mirelman D, Anbar M, Bracha R. Epigenetic transcriptional gene silencing in *Entamoeba*  
905 *histolytica*. IUBMB Life. 2008;60(9):598–604.
- 906 33. Pagliarini DJ, Worby CA, Dixon JE. A PTEN-like phosphatase with a novel substrate  
907 specificity. J Biol Chem. 2004;279(37):38590–6.
- 908 34. Taylor GS, Dixon JE. PTEN and Myotubularins: Families of Phosphoinositide  
909 Phosphatases. Methods Enzymol. 2003;366(1997):43–56.



- 910 35. Naguib A, Bencze G, Cho H, Zheng W, Tocilj A, Elkayam E, et al. PTEN functions by  
911 recruitment to cytoplasmic vesicles. *Mol Cell*. 2015;58(2):255–68.
- 912 36. Allen L-AH. Phosphoinositide3-kinase regulates actin polymerization during delayed  
913 phagocytosis of *Helicobacter pylori*. *J Leukoc Biol*. 2005;78(1):220–30.
- 914 37. Kamen LA, Levinsohn J, Swanson JA. Differential association of phosphatidylinositol 3-  
915 kinase, SHIP-1, and PTEN with forming phagosomes. *Mol Biol Cell*. 2007;18(7):2463-72.  
916 doi: 10.1091/mbc.e07-01-0061.
- 917 38. Schabbauer G, Matt U, Günzl P, Warszawska J, Furtner T, Hainzl E, et al. Myeloid PTEN  
918 Promotes Inflammation but Impairs Bactericidal Activities during Murine Pneumococcal  
919 Pneumonia. *J Immunol*. 2010;185(1):468–76.
- 920 39. Mondal S, Ghosh-Roy S, Loison F, Li Y, Jia Y, Harris C, et al. PTEN Negatively Regulates  
921 Engulfment of Apoptotic Cells by Modulating Activation of Rac GTPase. *J Immunol*.  
922 2011;187(11):5783–94.
- 923 40. Li Y, Prasad A, Jia Y, Roy SG, Loison F, Mondal S, et al. Pretreatment with phosphatase  
924 and tensin homolog deleted on chromosome 10 (PTEN) inhibitor SF1670 augments the  
925 efficacy of granulocyte transfusion in a clinically relevant mouse model. *Blood*.  
926 2011;117(24):6702–13.
- 927 41. Byekova YA, Powell RR, Welter BH, Temesvari LA. Localization of phosphatidylinositol  
928 (3,4,5)-trisphosphate to phagosomes in *Entamoeba histolytica* achieved using glutathione  
929 S-transferase- and green fluorescent protein-tagged lipid biosensors. *Infect Immun*.  
930 2010;78(1):125–37.

- 931 42. Koushik AB, Powell RR, Temesvari LA. Localization of phosphatidylinositol 4,5-  
932 bisphosphate to lipid rafts and uroids in the human protozoan parasite *Entamoeba*  
933 *histolytica*. *Infect Immun*. 2013;81(6):2145–55.
- 934 43. Reyes-López M, Piña-Vázquez C, Serrano-Luna J. Transferrin: Endocytosis and cell  
935 signaling in parasitic protozoa. *Biomed Res Int*. 2015;2015. doi: 10.1155/2015/641392
- 936 44. Reyes-López M, Bermúdez-Cruz RM, Avila EE, De La Garza M. Acetaldehyde/alcohol  
937 dehydrogenase-2 (EhADH2) and clathrin are involved in internalization of human  
938 transferrin by *Entamoeba histolytica*. *Microbiology*. 2011;157(1):209–19.
- 939 45. Welter BH, Powell RR, Laughlin RC, McGugan GC, Bonner M, King A, et al. *Entamoeba*  
940 *histolytica*: Comparison of the role of receptors and filamentous actin among various  
941 endocytic processes. *Exp Parasitol*. 2006;113(2):91–9.
- 942 46. López-Soto F, León-Sicairos N, Reyes-López M, Serrano-Luna J, Ordaz-Pichardo C, Piña-  
943 Vázquez C, et al. Use and endocytosis of iron-containing proteins by *Entamoeba*  
944 *histolytica* trophozoites. *Infect Genet Evol*. 2009;9(6):1038–50.
- 945 47. Bohdanowicz M, Grinstein S. Role of phospholipids in endocytosis, phagocytosis, and  
946 macropinocytosis. *Physiol Rev*. 2013; 93: 69–106. doi:10.1152/physrev.00002.2012
- 947 48. Schink KO, Tan KW, Stenmark H. Phosphoinositides in control of membrane  
948 dynamics. *Annu. Rev. Cell Dev. Biol*. 2016; 32:143–71. doi: 10.1146/annurev-cellbio-  
949 111315-125349
- 950 49. Abe N, Inoue T, Galvez T, Klein L, Meyer T. Dissecting the role of PtdIns(4,5)P<sub>2</sub> in  
951 endocytosis and recycling of the transferrin receptor. *J Cell Sci*. 2008 May 1;121(Pt  
952 9):1488–94. doi: 10.1242/jcs.020792.

- 953 50. Das K, Watanabe N, Nozaki T. Two StAR-related lipid transfer proteins play specific roles  
954 in endocytosis, exocytosis, and motility in the parasitic protist *Entamoeba histolytica*.  
955 PLoS Pathog. 2021; 17:1–27.
- 956 51. Fujii M, Kawai K, Egami Y, Araki N. Dissecting the roles of Rac1 activation and  
957 deactivation in macropinocytosis using microscopic photo-manipulation. Sci Rep.  
958 2013;3:1–10.
- 959 52. Swanson JA. Shaping cups into phagosomes and macropinosomes. Nat Rev Mol Cell Biol.  
960 2008;9(8):639–49.
- 961 53. Temesvari L, Zhang L, Fodera B, Janssen KP, Schleicher M, Cardelli JA. Inactivation of  
962 ImpA, encoding a LIMPII-related endosomal protein, suppresses the internalization and  
963 endosomal trafficking defects in profilin- null mutants. Mol Biol Cell. 2000;11(6):2019–  
964 31. doi: 10.1091/mbc.11.6.2019
- 965 54. Seastone DJ, Lee E, Bush J, Knecht D, Cardelli J. Overexpression of a novel Rho family  
966 GTPase, RacC, induces unusual actin-based structures and positively affects phagocytosis  
967 in *Dictyostelium discoideum*. Mol Biol Cell. 1998;9(10):2891–904.
- 968 55. Seastone DJ, Zhang L, Buczynski G, Rebstein P, Weeks G, Spiegelman G, et al. The small  
969 M(r) Ras-like GTPase Rap1 and the phospholipase C pathway act to regulate phagocytosis  
970 in *Dictyostelium discoideum*. Mol Biol Cell. 1999;10(2):393–406.
- 971 56. Veltman DM, Williams TD, Bloomfield G, Chen BC, Betzig E, Insall RH, et al. A plasma  
972 membrane template for macropinocytic cups. Elife. 2016;5(DECEMBER2016):24. DOI:  
973 10.7554/eLife.20085

- 974 57. Laughlin RC, McGugan GC, Powell RR, Welter BH, Temesvari LA. Involvement of raft-  
975 like plasma membrane domains of *Entamoeba histolytica* in pinocytosis and adhesion.  
976 Infect Immun. 2004;72(9):5349–57.
- 977 58. Reyes-López M, Piña-Vázquez C, Pérez-Salazar E, de la Garza M. Endocytosis, signal  
978 transduction and proteolytic cleaving of human holotransferrin in *Entamoeba histolytica*.  
979 Int J Parasitol. 2020;50(12):959–67.
- 980 59. Commisso C, Davidson SM, Soydaner-Azeloglu RG, Parker SJ, Kamphorst JJ, Hackett S,  
981 et al. Macropinocytosis of protein is an amino acid supply route in Ras-transformed cells.  
982 Nature. 2013 May 30;497(7451):633-7. doi: 10.1038/nature12138.
- 983 60. Hacker U, Albrecht R, Maniak M. Fluid-phase uptake by macropinocytosis in  
984 *dictyostelium*. J Cell Sci. 1997;110(2):105–12.
- 985 61. Muñoz-Muñoz PLA, Mares-Alejandre RE, Meléndez-López SG, Ramos-Ibarra MA.  
986 Bioinformatic analysis of two TOR (Target of rapamycin)-like proteins encoded by  
987 *Entamoeba histolytica* revealed structural similarities with functional homologs. Genes.  
988 2021;12(8). doi: 10.3390/genes12081139
- 989 62. Janetopoulos C, Borleis J, Vazquez F, Iijima M, Devreotes P. Temporal and spatial  
990 regulation of phosphoinositide signaling mediates cytokinesis. Dev Cell. 2005;8(4):467–  
991 77.
- 992 63. Pramanik MK, Iijima M, Iwadate Y, Yumura S. PTEN is a mechanosensing signal  
993 transducer for myosin II localization in *Dictyostelium* cells. Genes to Cells.  
994 2009;14(7):821–34.

- 995 64. Arhets P, Olivo JC, Gounon P, Sansonetti P, Guillén N. Virulence and functions of myosin  
996 II are inhibited by overexpression of light meromyosin in *Entamoeba histolytica*. Mol Biol  
997 Cell. 1998;9(6):1537–47.
- 998 65. Das S, Dixon JE, Cho W. Membrane-binding and activation mechanism of PTEN. Proc  
999 Natl Acad Sci U S A. 2003;100(13):7491–6.
- 1000 66. Vazquez F, Matsuoka S, Sellers WR, Yanagida T, Ueda M, Devreotes PN. Tumor  
1001 suppressor PTEN acts through dynamic interaction with the plasma membrane. Proc Natl  
1002 Acad Sci U S A. 2006;103(10):3633–8.
- 1003 67. Iijima M, Huang YE, Luo HR, Vazquez F, Devreotes PN. Novel mechanism of PTEN  
1004 regulation by its phosphatidylinositol 4,5-bisphosphate binding motif is critical for  
1005 chemotaxis. J Biol Chem. 2004;279(16):16606–13.
- 1006 68. Wessels D, Lusche DF, Kuhl S, Held P, Soll DR. PTEN plays a role in the suppression of  
1007 lateral pseudopod formation during *Dictyostelium* motility and chemotaxis. J Cell Sci.  
1008 2007;120(15):2517–31.
- 1009 69. Iijima M, Devreotes P. Sensing of chemoattractant gradients. Cell. 2002;109:599–610.
- 1010 70. Arai Y, Shibata T, Matsuoka S, Sato MJ, Yanagida T, Ueda M. Self-organization of the  
1011 phosphatidylinositol lipids signaling system for random cell migration. Proc Natl Acad Sci  
1012 U S A. 2010;107(27):12399–404.
- 1013 71. Leslie NR, Batty IH, Maccario H, Davidson L, Downes CP. Understanding PTEN  
1014 regulation: PIP2, polarity and protein stability. Oncogene. 2008;27(41):5464–76.
- 1015 72. Kölsch V, Charest PG, Firtel RA. The regulation of cell motility and chemotaxis by  
1016 phospholipid signaling. J Cell Sci. 2008;121(5):551–9.

- 1017 73. Tsujita K, Itoh T. Phosphoinositides in the regulation of actin cortex and cell migration.  
1018 Biochim Biophys Acta - Mol Cell Biol Lipids. 2015;1851(6):824–31.
- 1019 74. Labruyère E, Guillén N. Host tissue invasion by *Entamoeba histolytica* is powered by  
1020 motility and phagocytosis. Arch Med Res. 2006;37(2):252–7.
- 1021 75. Manich M, Hernandez-Cuevas N, Ospina-Villa JD, Syan S, Marchat LA, Olivo-Marin JC,  
1022 et al. Morphodynamics of the actin-rich cytoskeleton in *Entamoeba histolytica*. Front Cell  
1023 Infect Microbiol. 2018;8(MAY):1–16.
- 1024 76. Thompson JD, Higgins DG, Gibson TJ. CLUSTAL W: Improving the sensitivity of  
1025 progressive multiple sequence alignment through sequence weighting, position-specific  
1026 gap penalties and weight matrix choice. Nucleic Acids Res. 1994;22(22):4673–80.
- 1027 77. Diamond LS, Mattern CF, Bartgis IL. Viruses of *Entamoeba histolytica*. I. Identification  
1028 of transmissible virus-like agents. J Virol. 1972;9(2):326-41.
- 1029 78. Bracha R, Nuchamowitz Y, Anbar M, Mirelman D. Transcriptional silencing of multiple  
1030 genes in trophozoites of *Entamoeba histolytica*. PLoS Pathog. 2006;2(5):431–41
- 1031 79. Diamond LS, Harlow DR, Cunnick CC. A new medium for the axenic cultivation of  
1032 *Entamoeba histolytica* and other entamoeba. Trans R Soc Trop Med Hyg. 1978;72(4):431–  
1033 2.
- 1034 80. Mi-ichi F, Makiuchi T, Furukawa A, Sato D, Nozaki T. Sulfate activation in mitosomes  
1035 plays an important role in the proliferation of *Entamoeba histolytica*. PLoS Negl Trop Dis.  
1036 2011;5(8):1–7.
- 1037 81. Nozaki T, Asai T, Sanchez LB, Kobayashi S, Nakazawa M, Takeuchi T. Characterization  
1038 of the gene encoding serine acetyltransferase, a regulated enzyme of cysteine biosynthesis  
1039 protist parasites *Entamoeba histolytica* and *Entamoeba dispar*. Regulation and possible

- 1040 function of the cysteine biosynthetic pathway in *Entamoeba*. J Biol Chem.  
1041 1999;274(45):32445–52.
- 1042 82. Nozaki T, Asai T, Kobayashi S, Ikegami F, Noji M, Saito K, et al. Molecular cloning and  
1043 characterization of the genes encoding two isoforms of cysteine synthase in the enteric  
1044 protozoan parasite *Entamoeba histolytica*. Mol Biochem Parasitol. 1998;97(1–2):33–44.
- 1045 83. Mak LH, Woscholski R. Targeting PTEN using small molecule inhibitors. Methods.  
1046 2015;77:63–8.

A

*Homo sapiens*

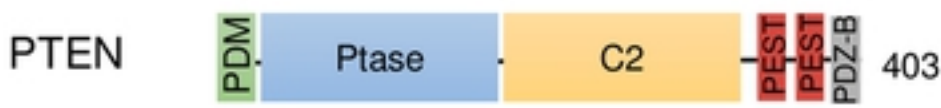

*Entamoeba histolytica*

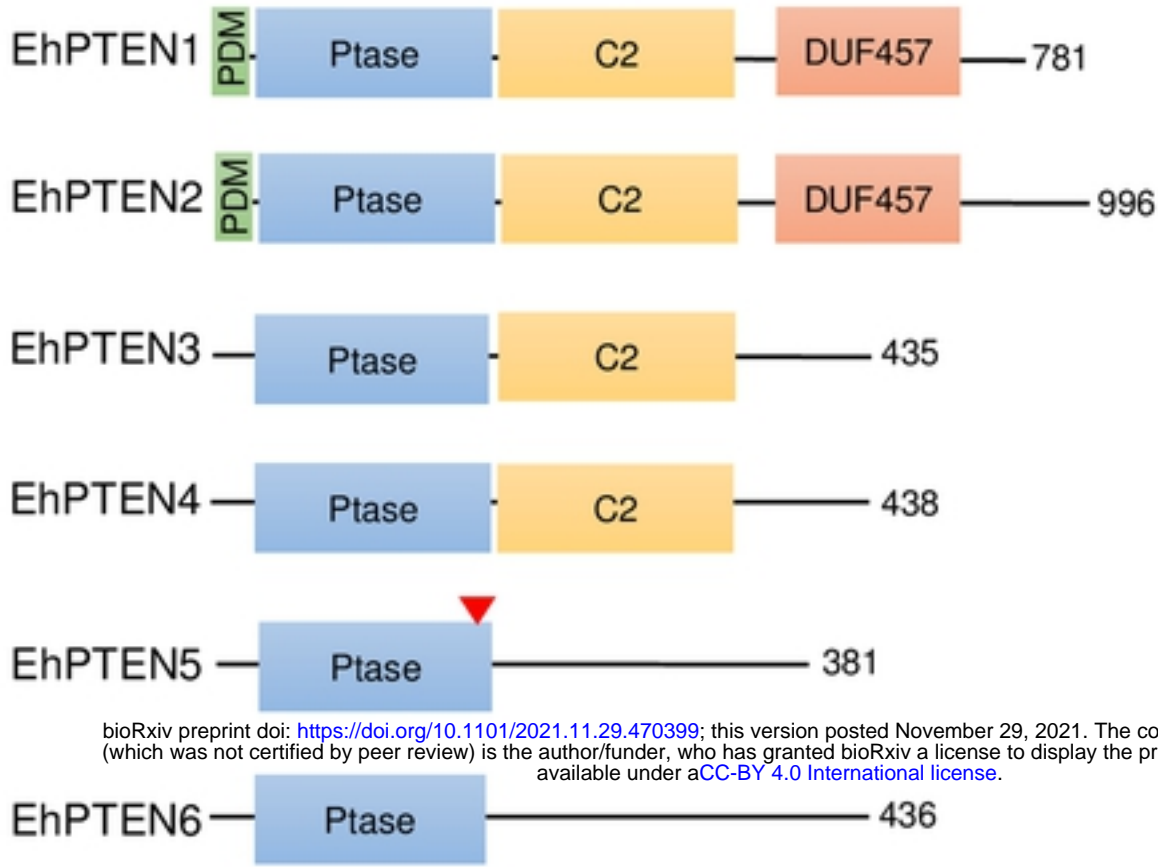

bioRxiv preprint doi: <https://doi.org/10.1101/2021.11.29.470399>; this version posted November 29, 2021. The copyright holder for this preprint (which was not certified by peer review) is the author/funder, who has granted bioRxiv a license to display the preprint in perpetuity. It is made available under aCC-BY 4.0 International license.

B

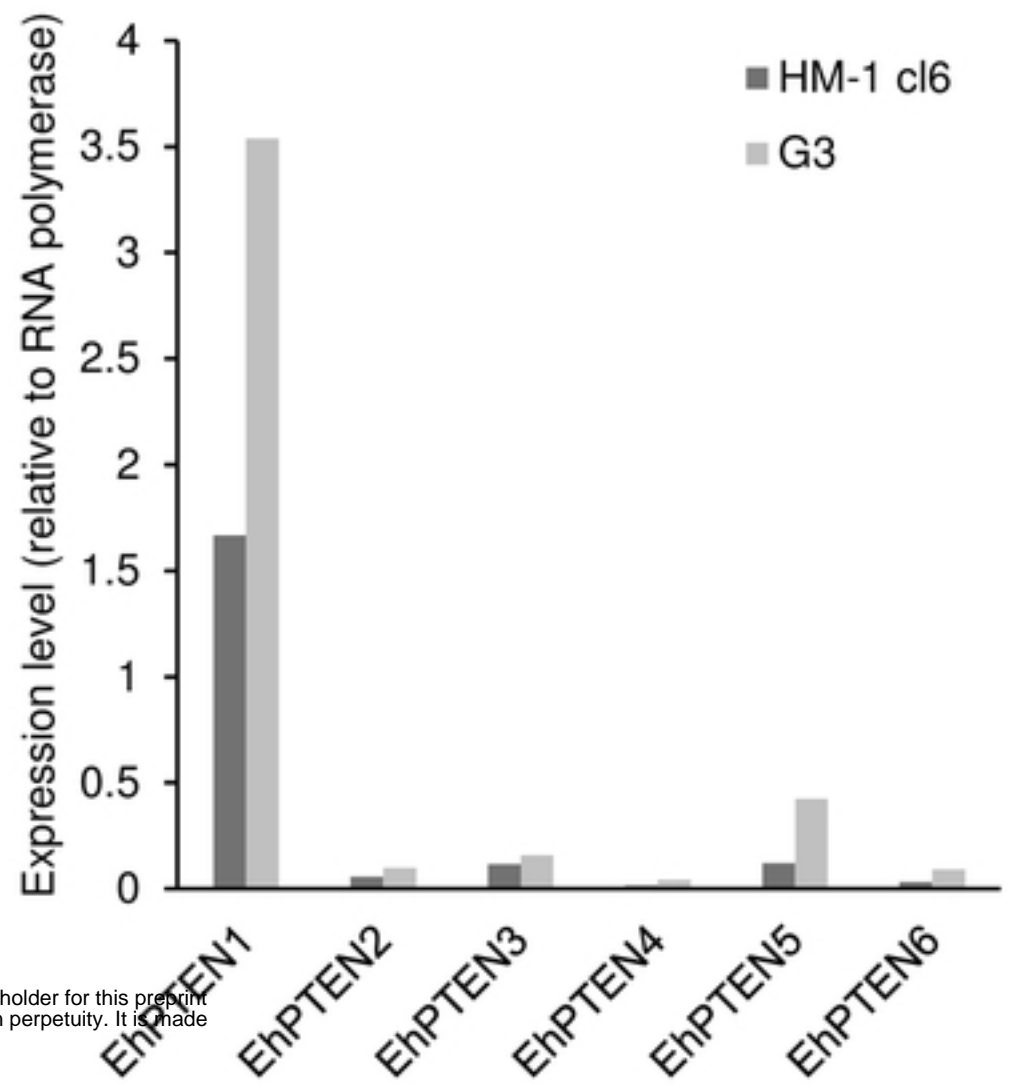

C

```

PTEN_Human      -----MTAIIKEIVSRNKRYQEDGFDLDLTYIYPNI IAMGFPAERLEGVYRNNIDDVVRFLDSKHKNHKIYNLCAERHYDTA-KFNCRVAQYPPFDHNPQLELIKPF  104
PTEN_Dictyostelium -----MSNLLRVAVSKQKRRYQKNGYDLIDLAYITDNI VAMGFPSEKVEGVFRNPMKDVQRFQYHDKHFKVYVNLCSERVYDHS-KFYGRVGYYPFDDHNPQFEMIDAF  104
EhPTEN1        MKELNNLENLNIHKKMTSVIREAVSKAKRRYQQYGFDDLDSYITPRI IAMGFPSEKFEAAAYRNPLVDVLFQFFETFHKGHYKVYNFCREKPYDGEHKIKGEYEFPPDDHNAPEYQIIPQL  120
               * : : : * : * : * : * : * : * : * : * : * : * : * : * : * : * : * : * : * : * : * : * : * : * : * : * : * : * :
PTEN_Human      CEDLDQWLSSEDDNHVAAIHCKAGKGRIGVMICAYLLHRGKFLKAQEALDFYGEVTRDCKKGVTI PSQRRYVYYSYLLKNHLDYRPVALLFHKMMFETIPMFS-----GGTCNP  213
PTEN_Dictyostelium CRDVDAMKEDSKNIAVICHCKAGKGRIGLMICCWLMYCGMWKNTEDSLRFYAALRTYNQKGVTI PSQIRYVGYFGRSIRESIKYVPRNVTLKKIVLRPLPKEINLSEVQFNISVGKNCVF  224
EhPTEN1        CKDVDDYLKADERNVIAIHCCKAGKGRIGLMSACFLVYMLDSLNAHEAIDFYGTTRTFNKKGVTI PSQLKYINYWSAALKYRFNIGERTVKMVKIEMTPPRIADEIFVKVST-----  232
               * : * : * : * : * : * : * : * : * : * : * : * : * : * : * : * : * : * : * : * : * : * : * : * : * : * : * : * :
PTEN_Human      -----QFVVCQLKVKI-----YSSNSGPTRRREDKFMFYFEFP  244
PTEN_Dictyostelium NSKEHNMNVVISKKKKTVV----DKNKKDPKKKLTKENSEKNIDSQQQQSQSSLSQSQQGQSSPNMQSLSASGTISSGNSVGTVNGNTLHQLGGSQFSLSDLADGNTIGNDEYISFEI-  339
EhPTEN1        -----FNEFVCEKSLTNNRKLTFKPAKDSKKNMKEEDALKLYDEI-----YGELK-----EEKGTVSTREAI-----CAWDWMRCI-EGEDRFGTDGSSSFFPI-  314
               : : : : . .
PTEN_Human      QPLPVCVDIKVEFFHKQNKMLKDKMFHFVNTFFIPGPEETSEKVENGLCDQEIDSICSIERADNDKEYLVLTLTKNDLDKANKDKANRYFSPNFKVKLYFTKTVEEPSNPEASSSTS  364
PTEN_Dictyostelium GALSLAGDIRIEFTNKQ----DDRPMFVWNTSFVQQLLEII-----PKSGLDKAHKDKNHKAFPEDFHVELTFFDQLDQQSHTTVVASA-  419
EhPTEN1        DPVTIHGDIKLEFTTSK----GGIFNIWNTWF IHDNRLEF-----SKMELDKGF--KDDKQLAPNFVKVLYFEDVTTAPAGEQEMPVCQ  393
               : : * : * : * : * : * : * : * : * : * : * : * : * : * : * : * : * : * : * : * : * :
PTEN_Human      VTP--D--VSDNEPDHYRYSDT-----TDSDPEN-----EPFDEDQ-----HTQITK-----V-----  403
PTEN_Dictyostelium -----EEQTNQHYPQSSNNVATSSSHHDNITVVASDAPQNNNNNNLNSSNSN-----NATTT-----TTKNNISL-ASSQSNPVQQESNPSTTTQVSEENSAPKVEAEKIE  516
EhPTEN1        VGIRTDIPEDVTDPSQVPPMPVSV-----ACDPNVNAECLLKETEAVENPKRVKAPTWPYIYHTSLNFKNFERIVSHKIQFPVQREF-----FNINPELDVVK--  487
               . : : : * :
PTEN_Human      -----  403
PTEN_Dictyostelium NSNASANDSETSSNSSS-----  533
EhPTEN1        E---TSRDPLEVSRVSVLYSIIQLYLRSGFYGRVLDYHIELIMLDNLDGVKLFEEQASELAVINLDNLTGEHEPFWINVYHIMLLHGLLYWRHRPNI EFKMLSNFKKFAKYGIGGICYTL  604
PTEN_Human      -----  403
PTEN_Dictyostelium -----  533
EhPTEN1        HEVLMGCLRQWPVKDSSIDKVVVFDSSNPKSKYAMKEADKSLGCLLSFGTTTTSPGIWLYSVEDFAQQKEIAINTYLNQRQAALAAKKEFYLMGNMKMFAKDYGGESNMKRELLARHGVE  724
PTEN_Human      -----  403
PTEN_Dictyostelium -----  533
EhPTEN1        HEIKKWSLKYQPEDRENRIILDHLIAQNI VVTHNPNVNLGQCHLFLKYEKPSVKDPKA  781
    
```

Fig1



A

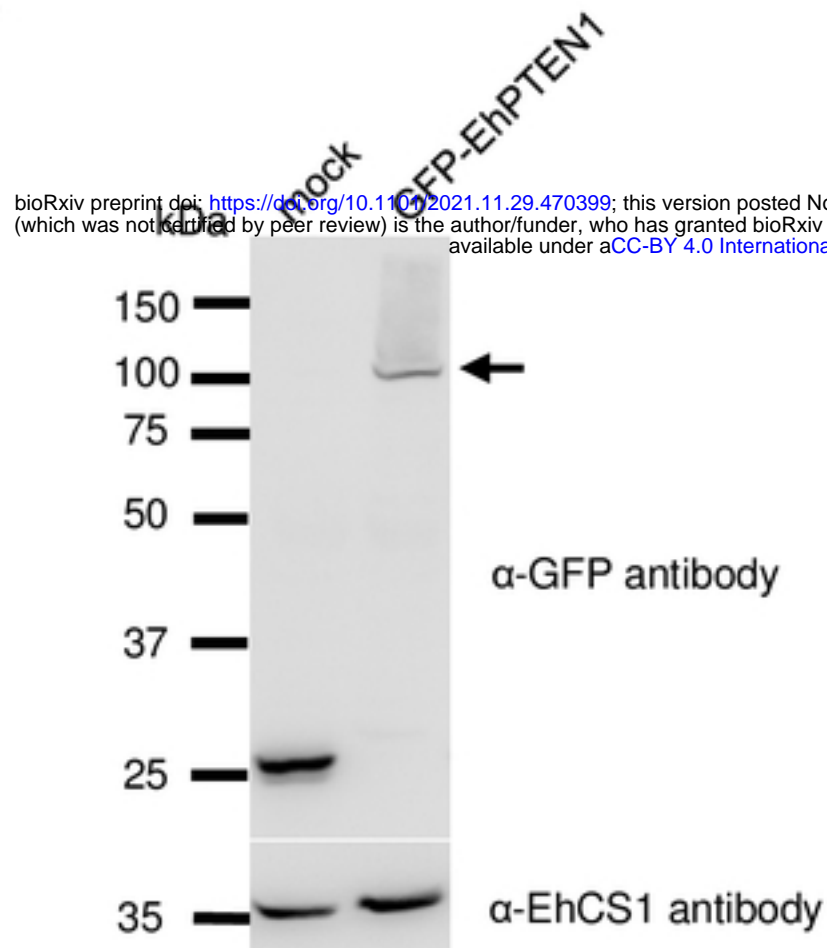

B

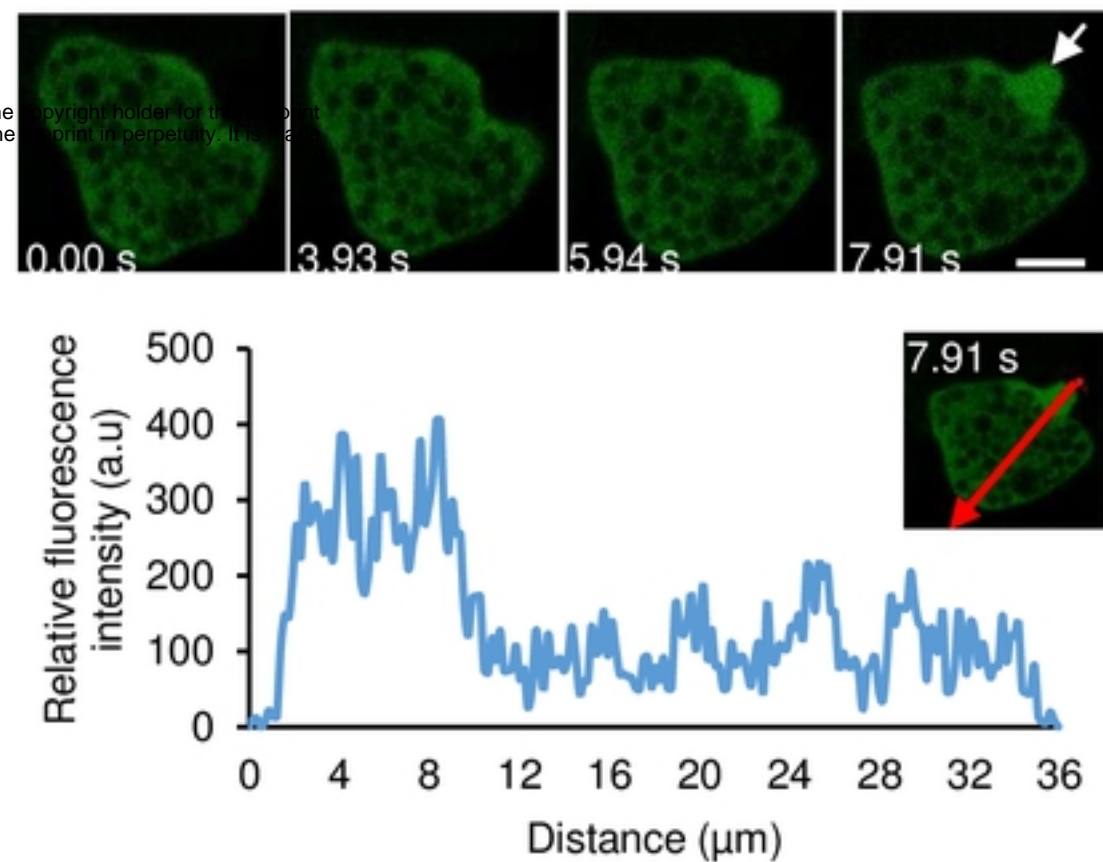

C

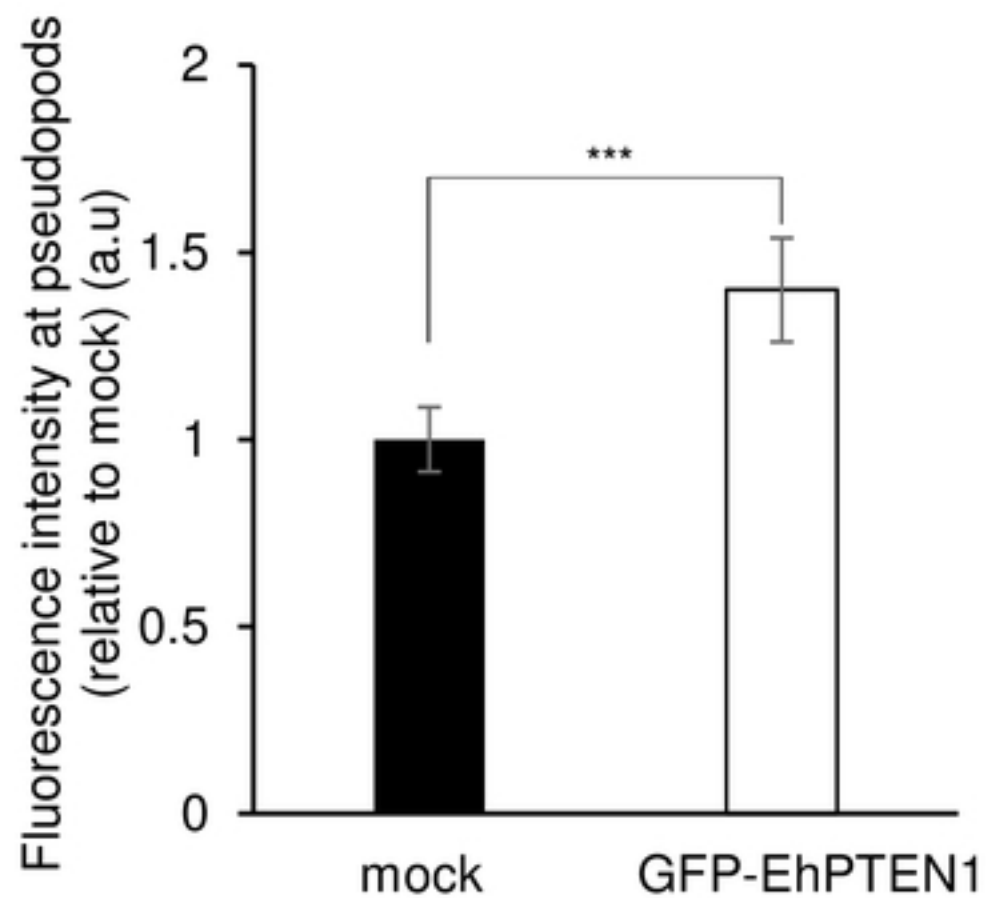

D

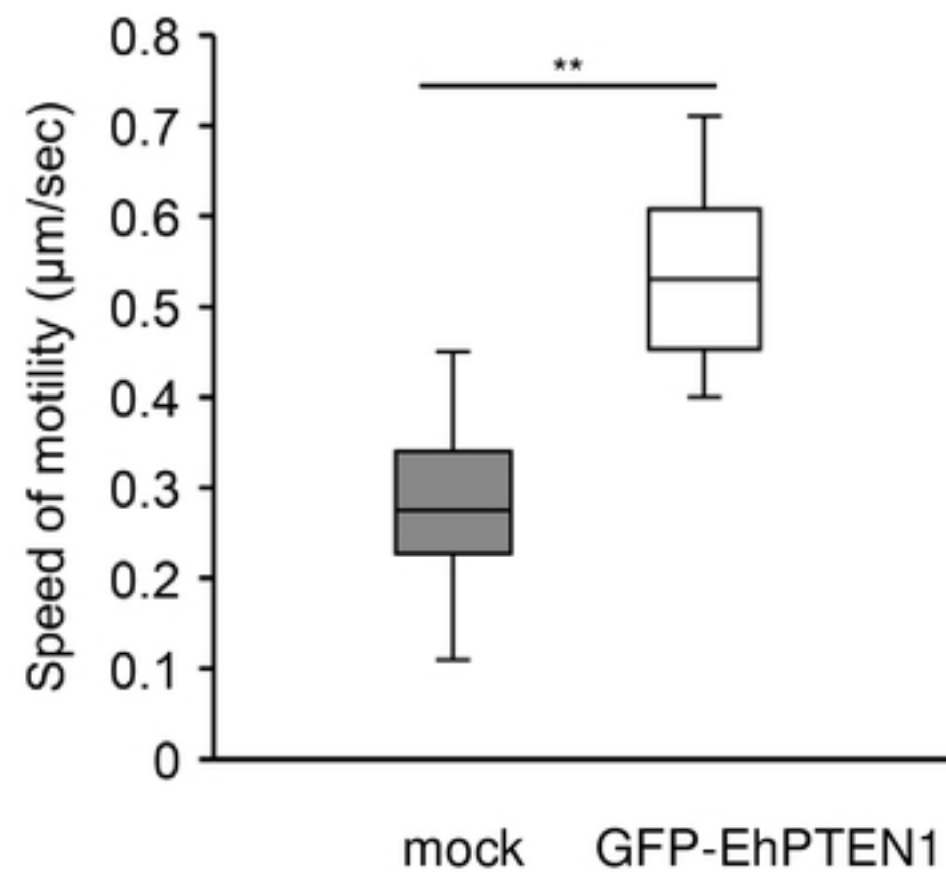

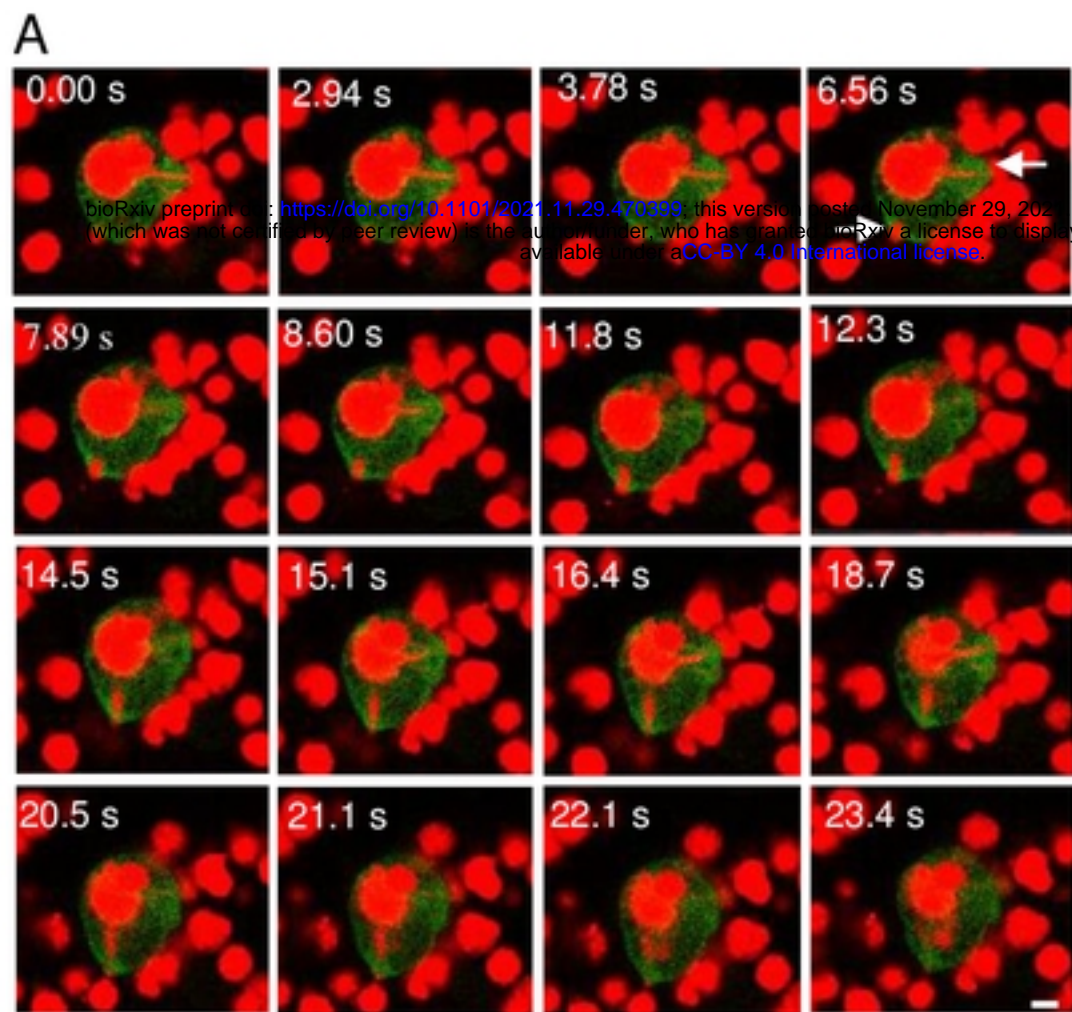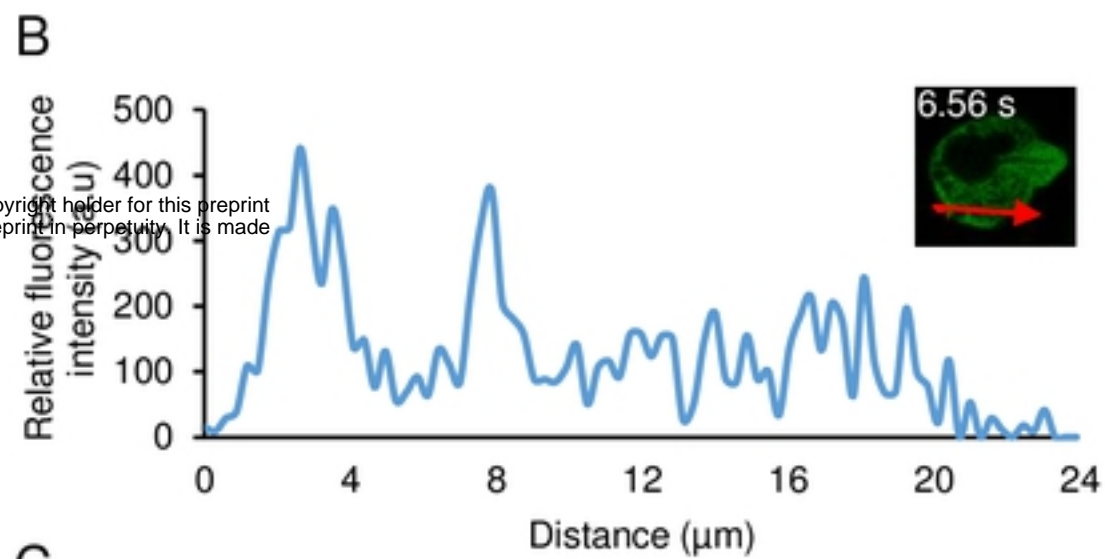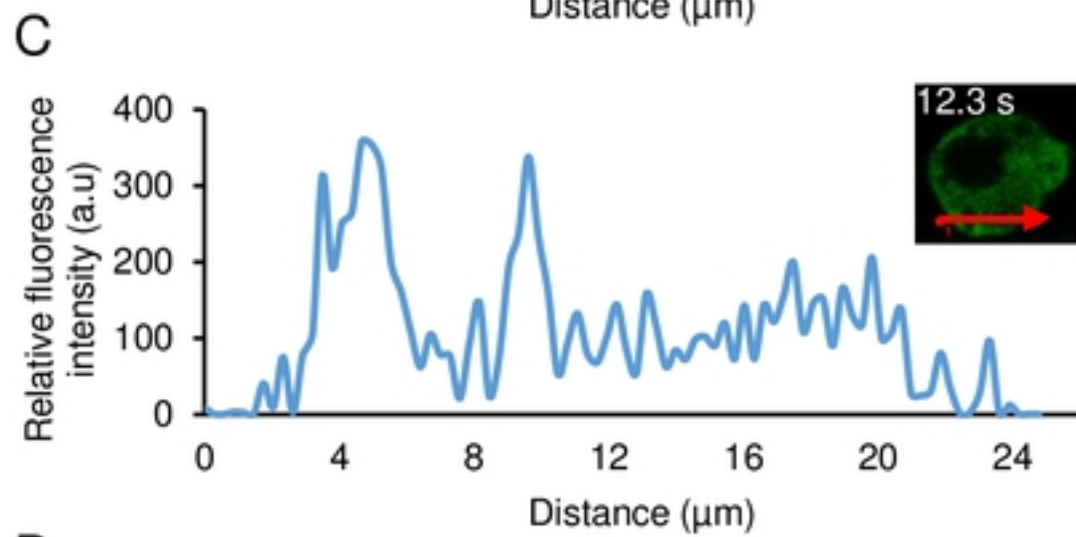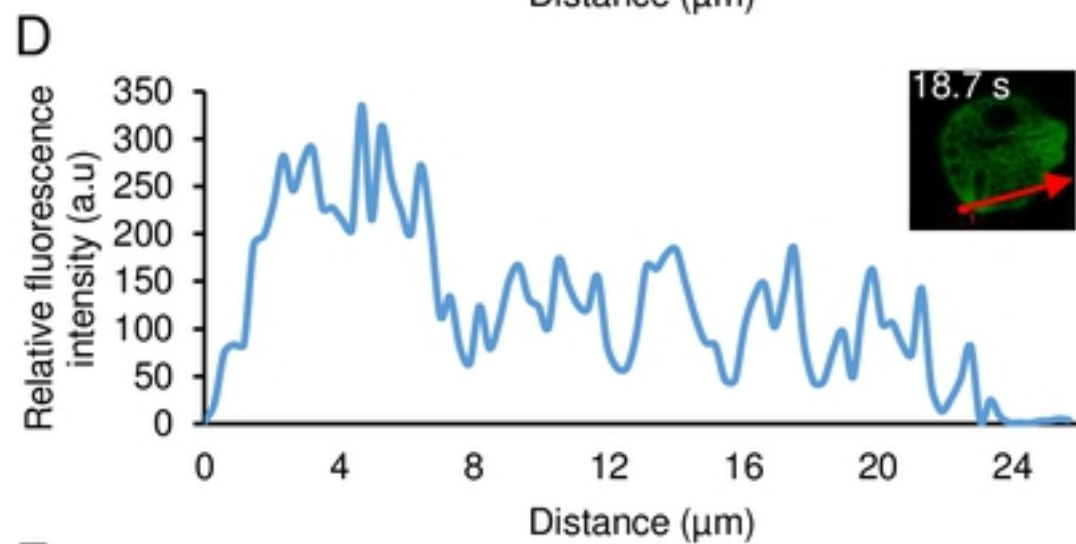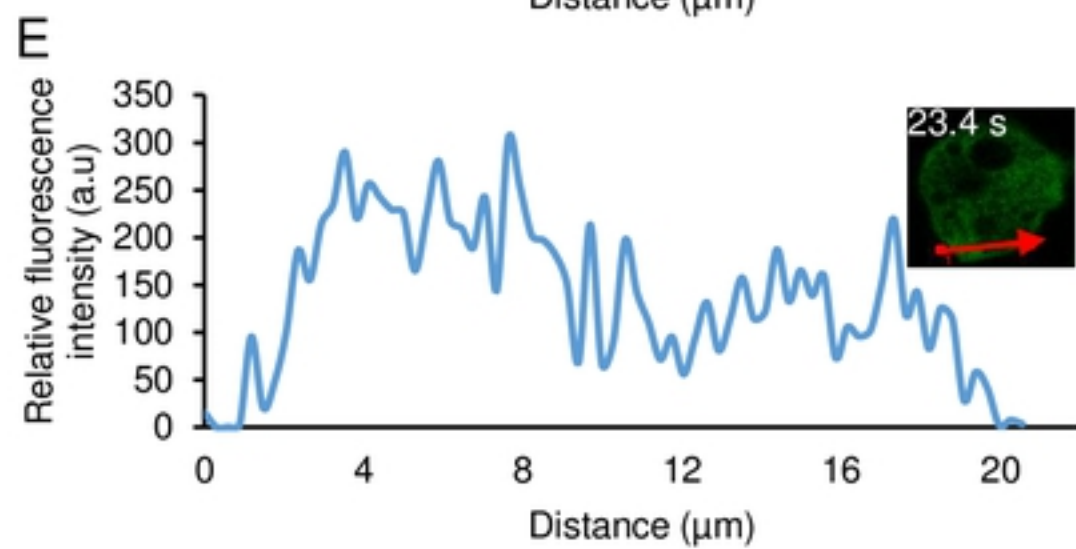

Fig3

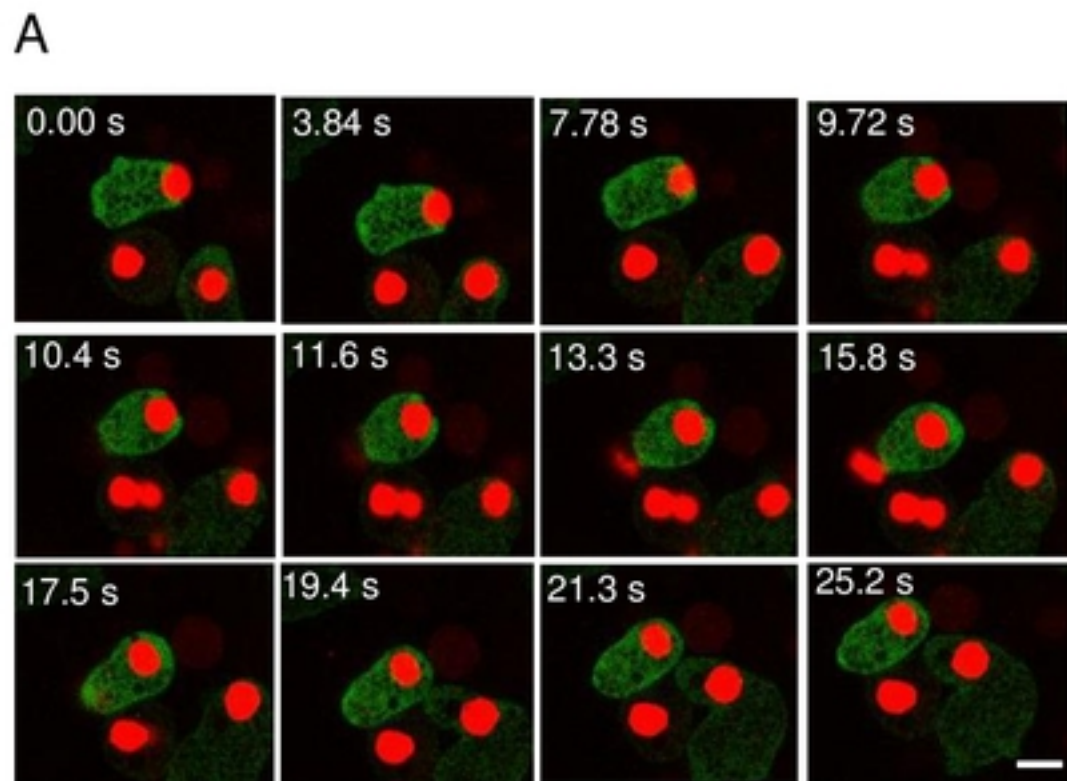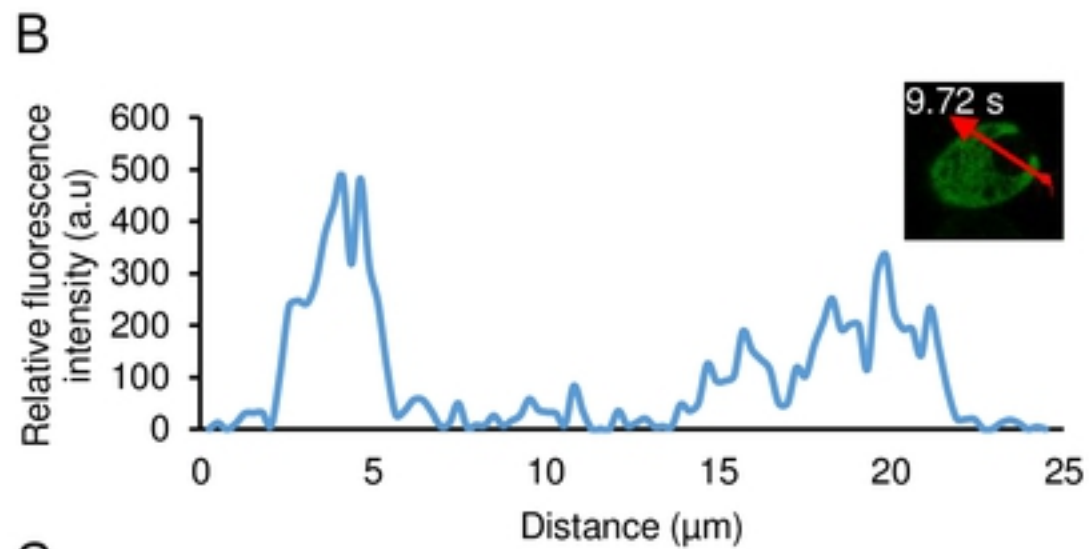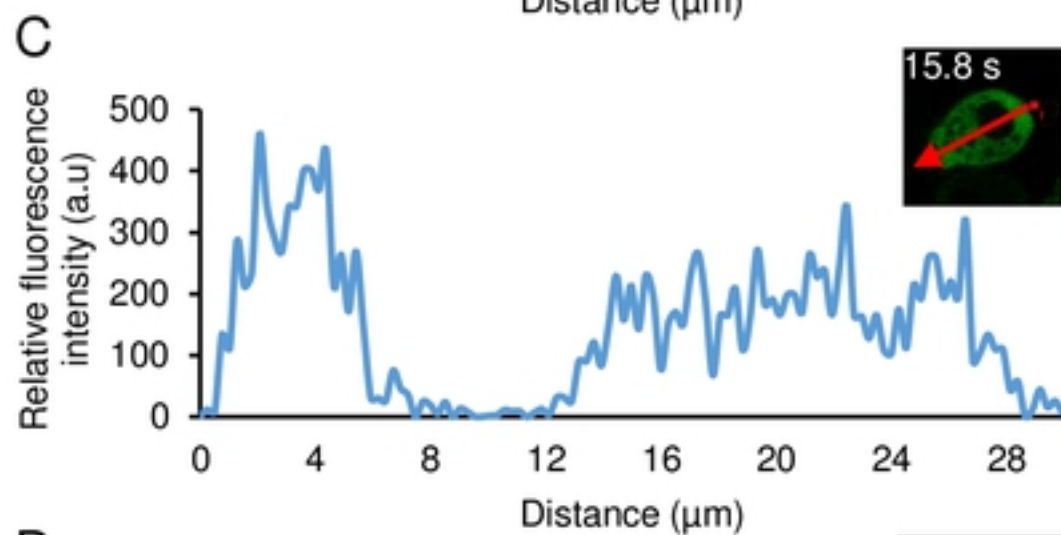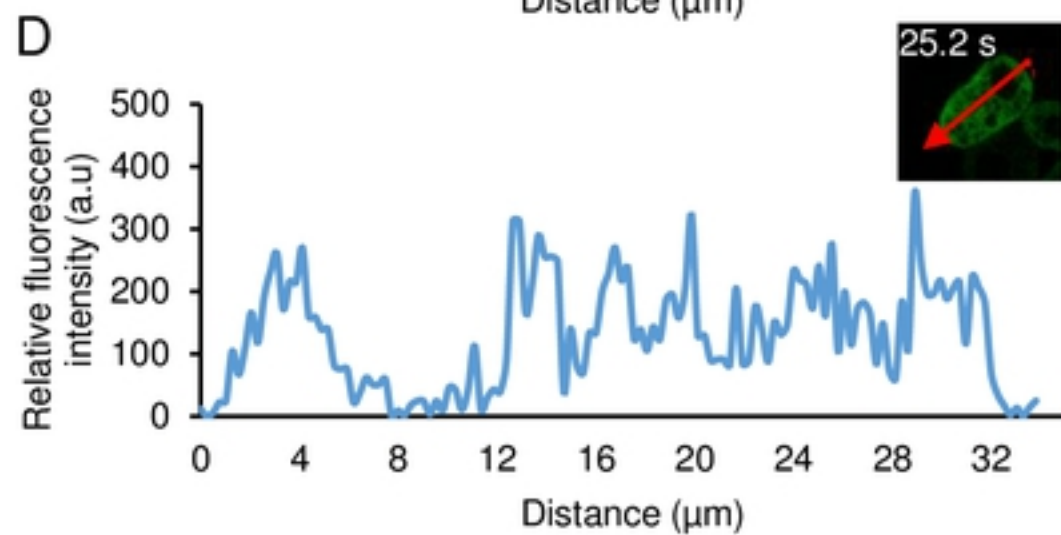

Fig4

A

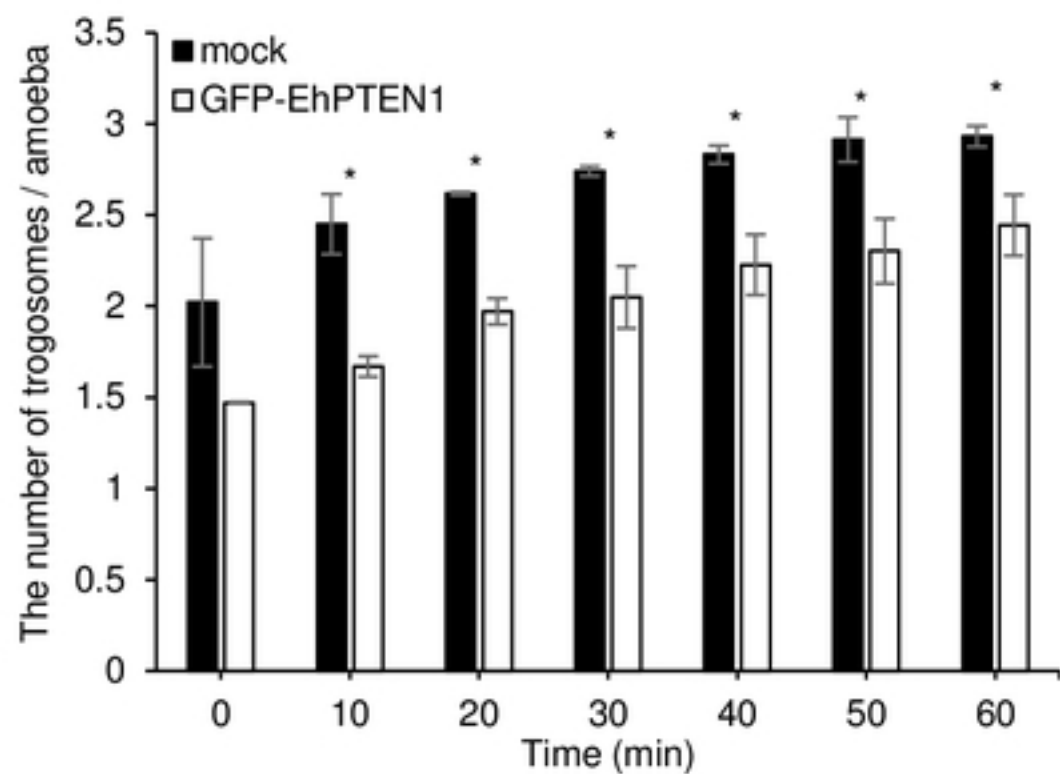

B

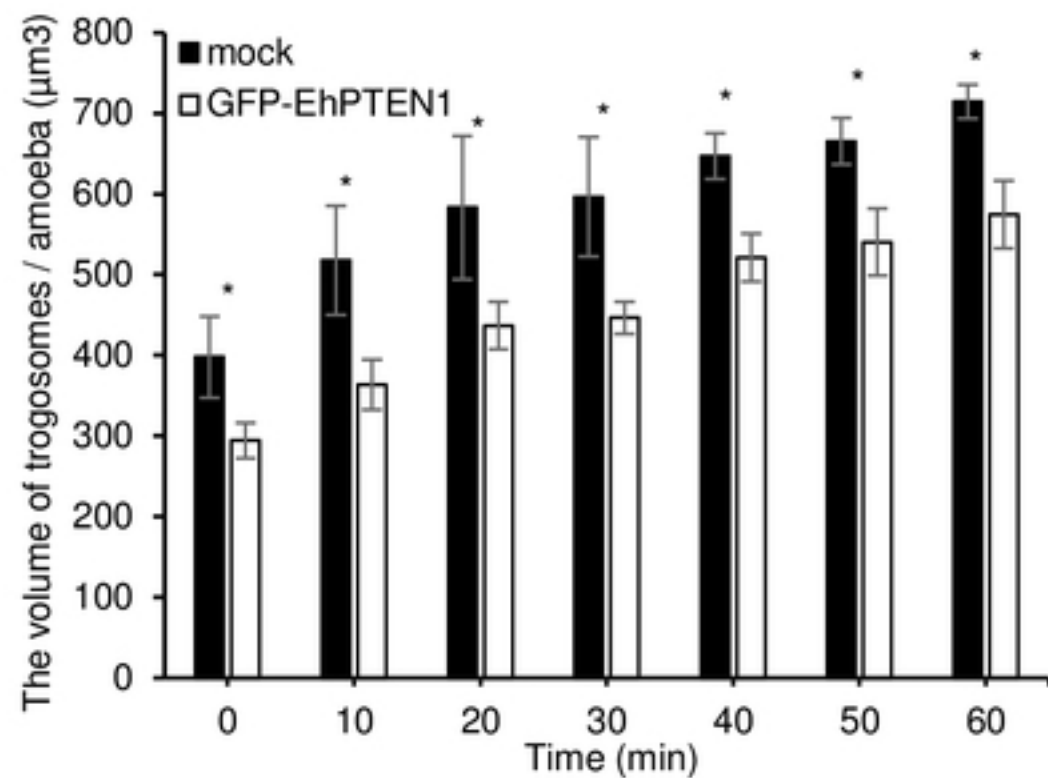

C

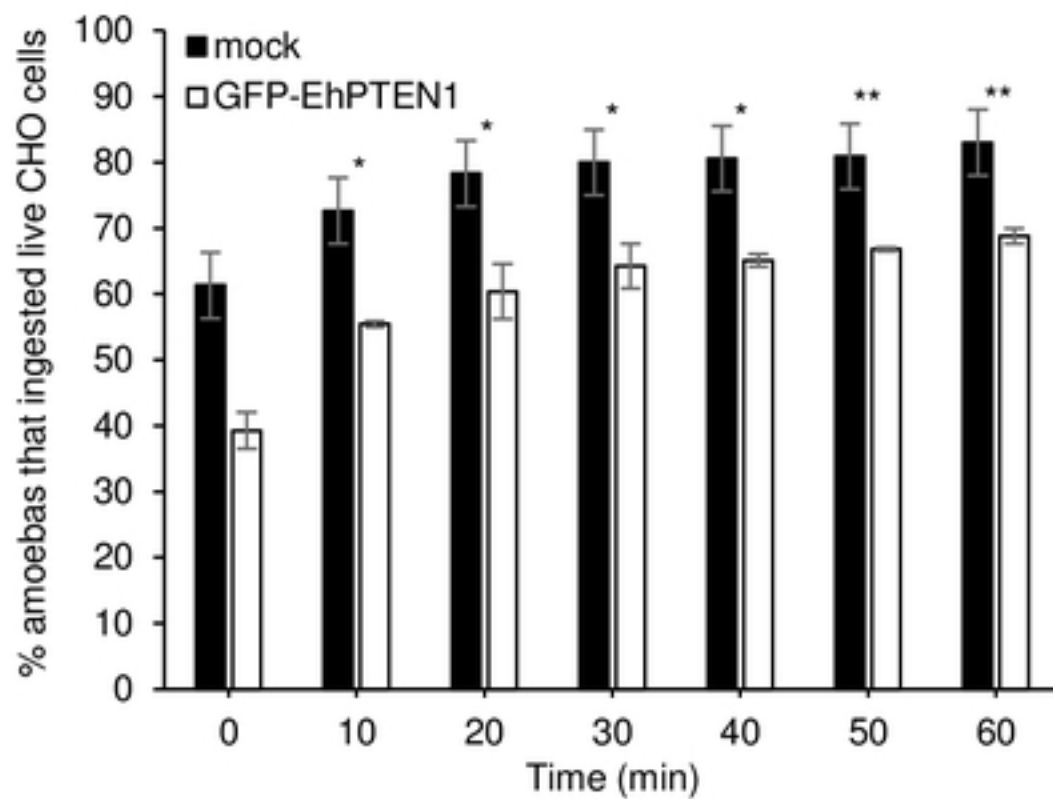

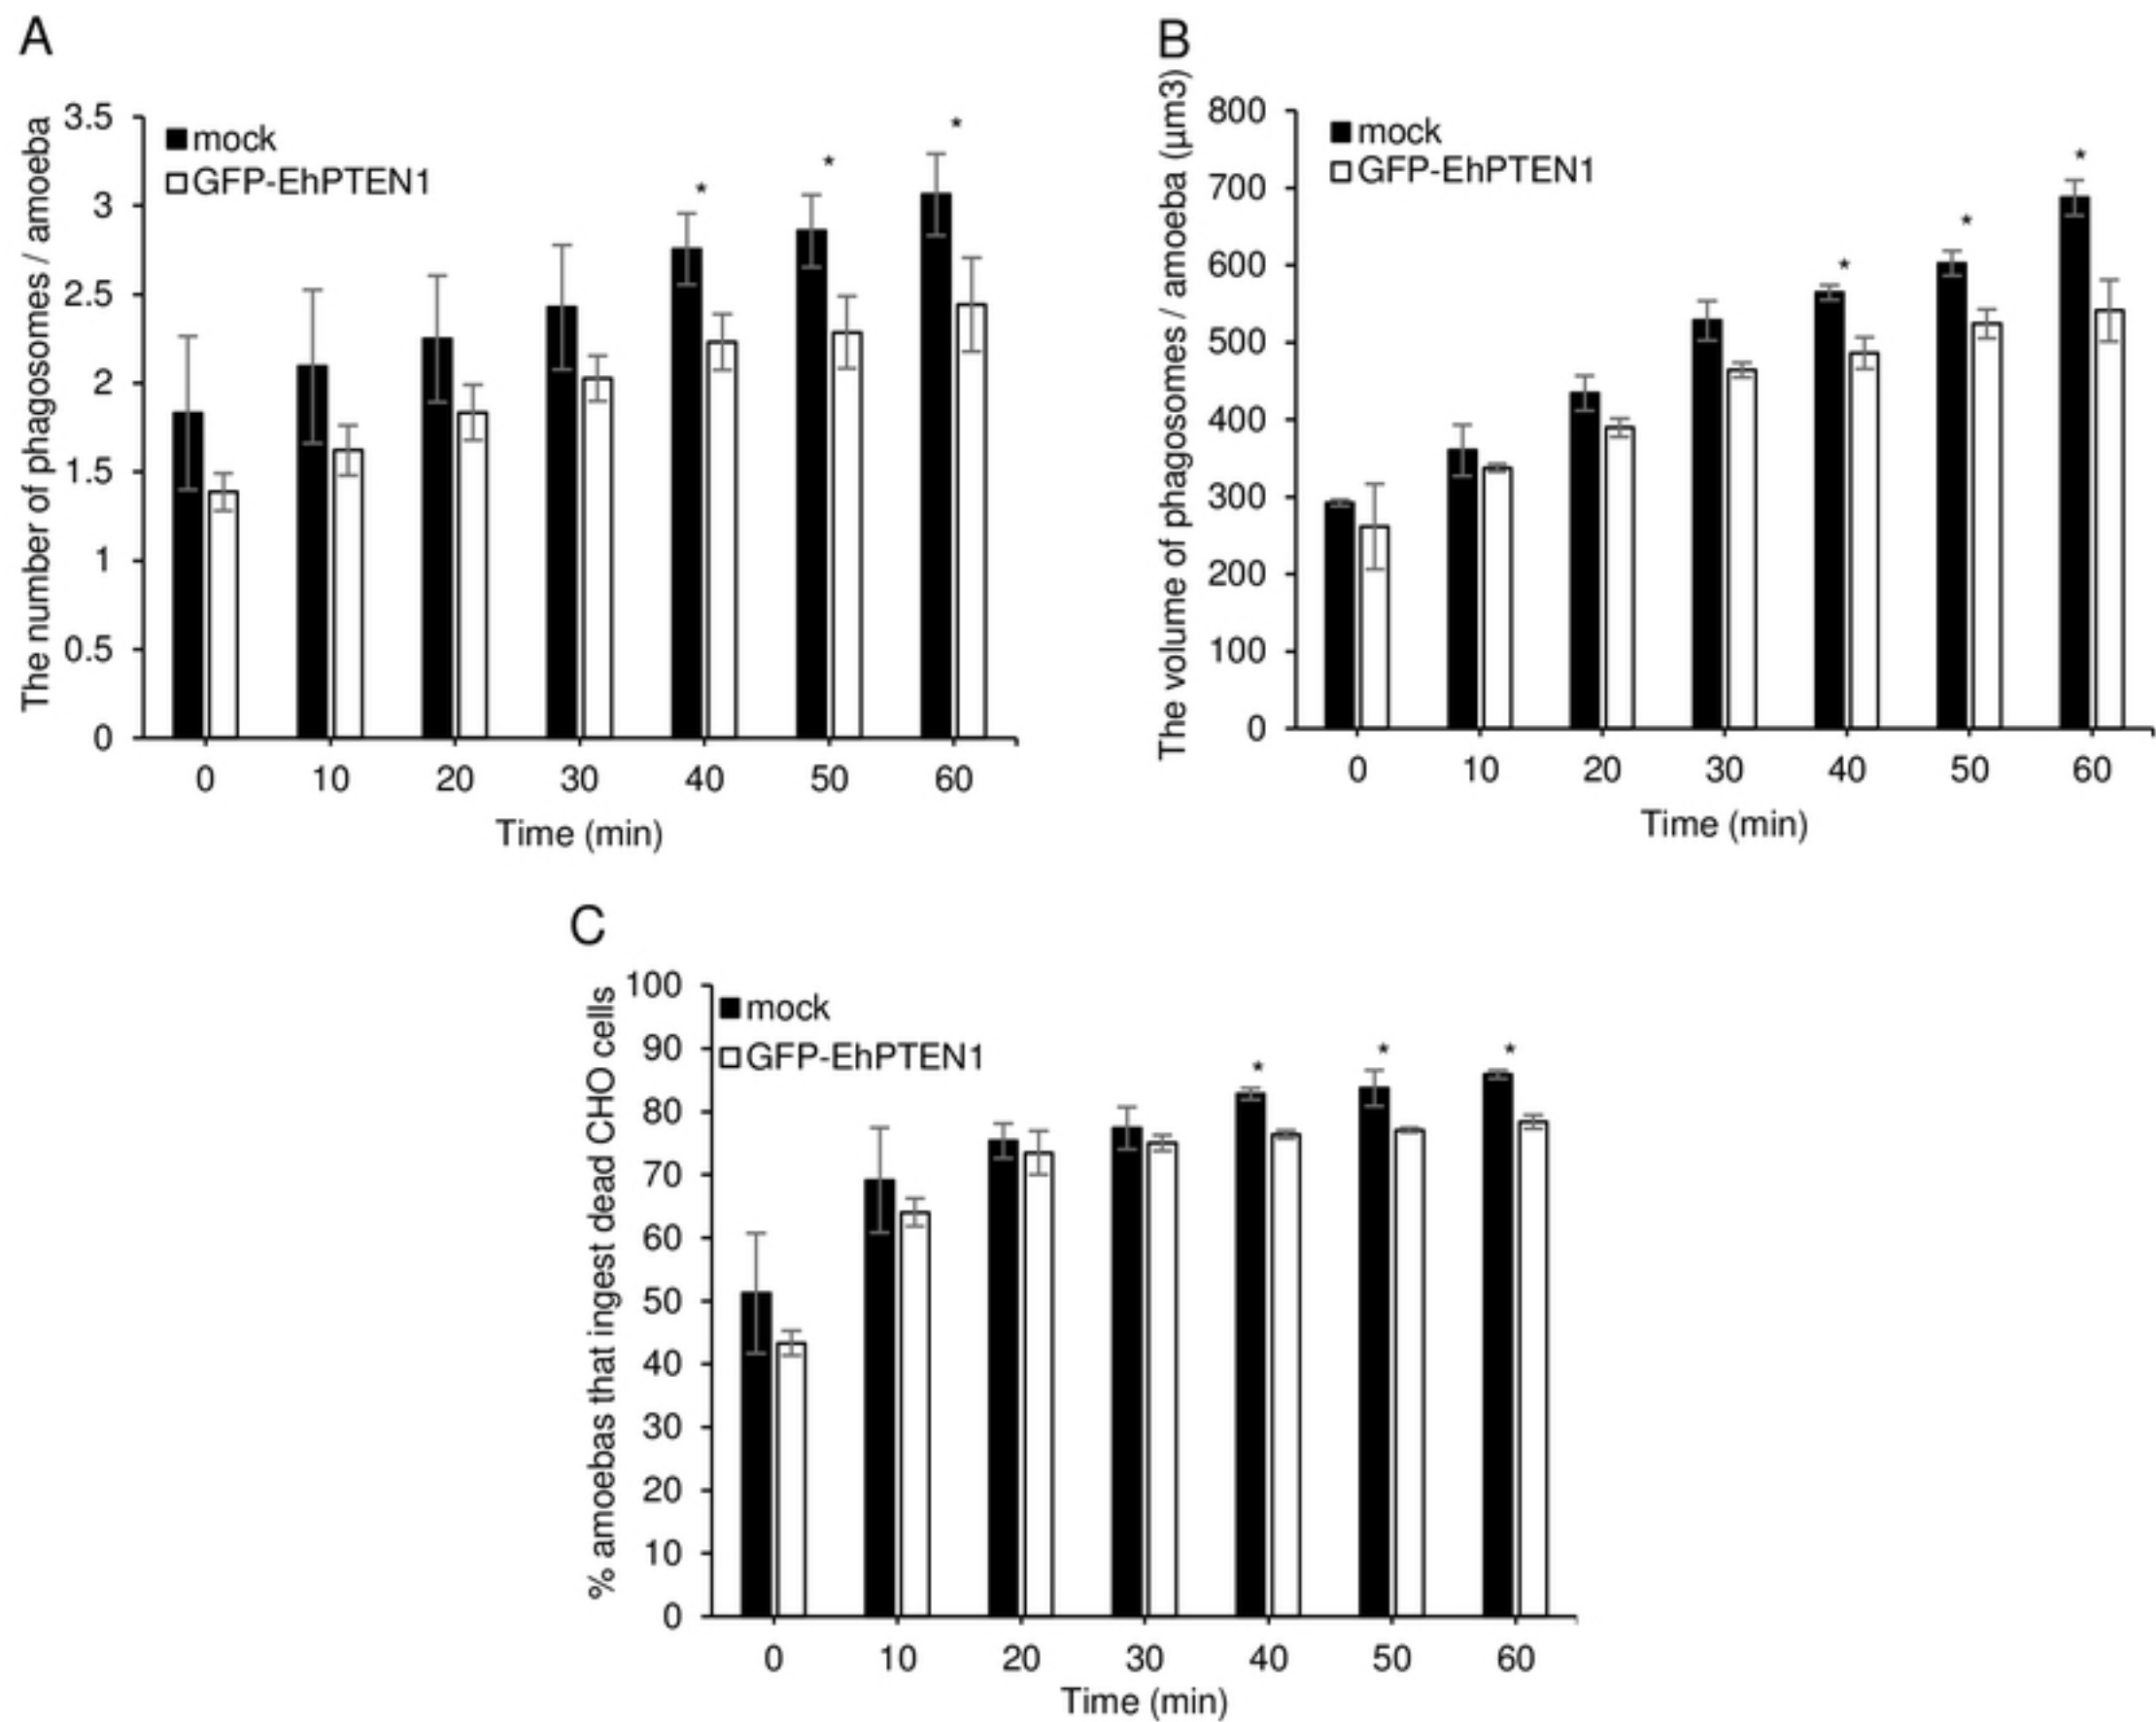

Fig6

A

bioRxiv preprint doi: <https://doi.org/10.1101/2021.11.29.470399>; this version posted November 29, 2021. The copyright holder for this preprint (which was not certified by peer review) is the author/funder, who has granted bioRxiv a license to display the preprint in perpetuity. It is made available under aCC-BY 4.0 International license.

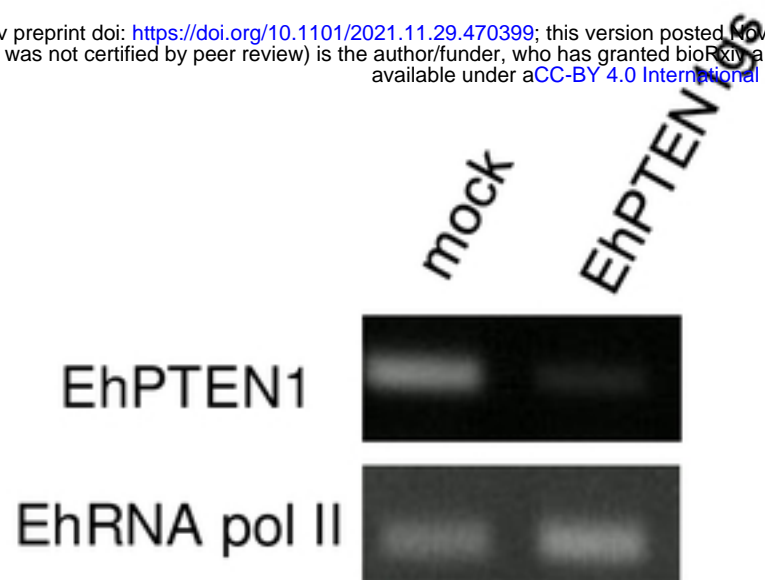

B

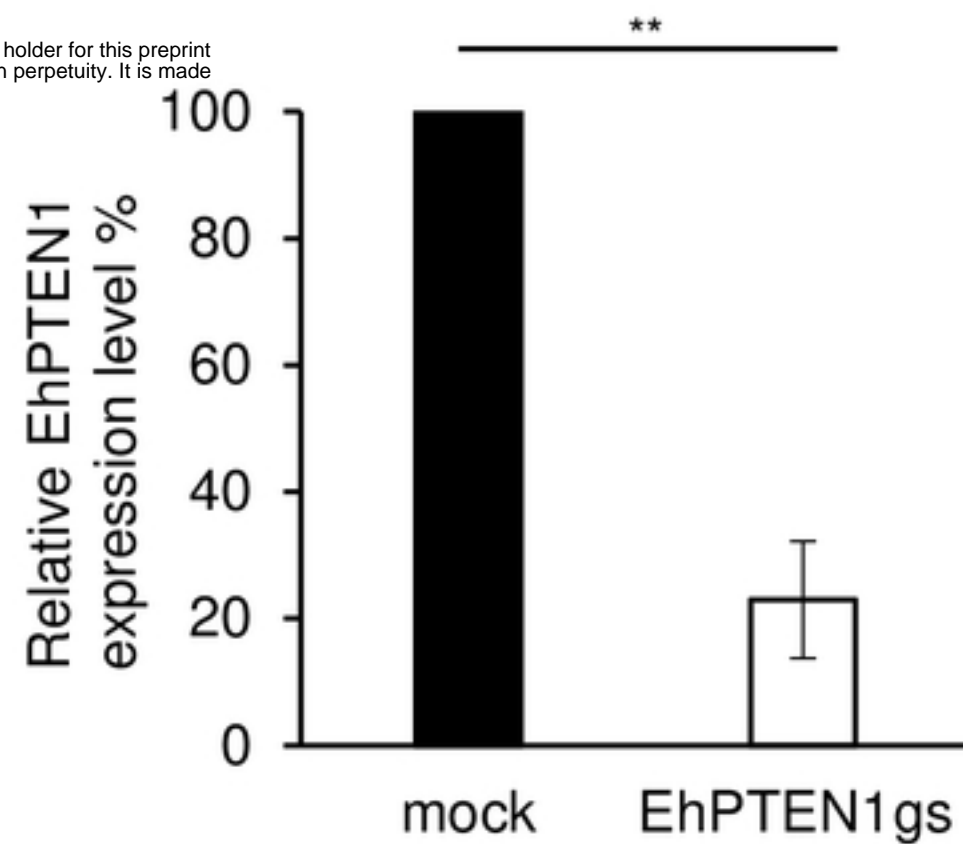

C

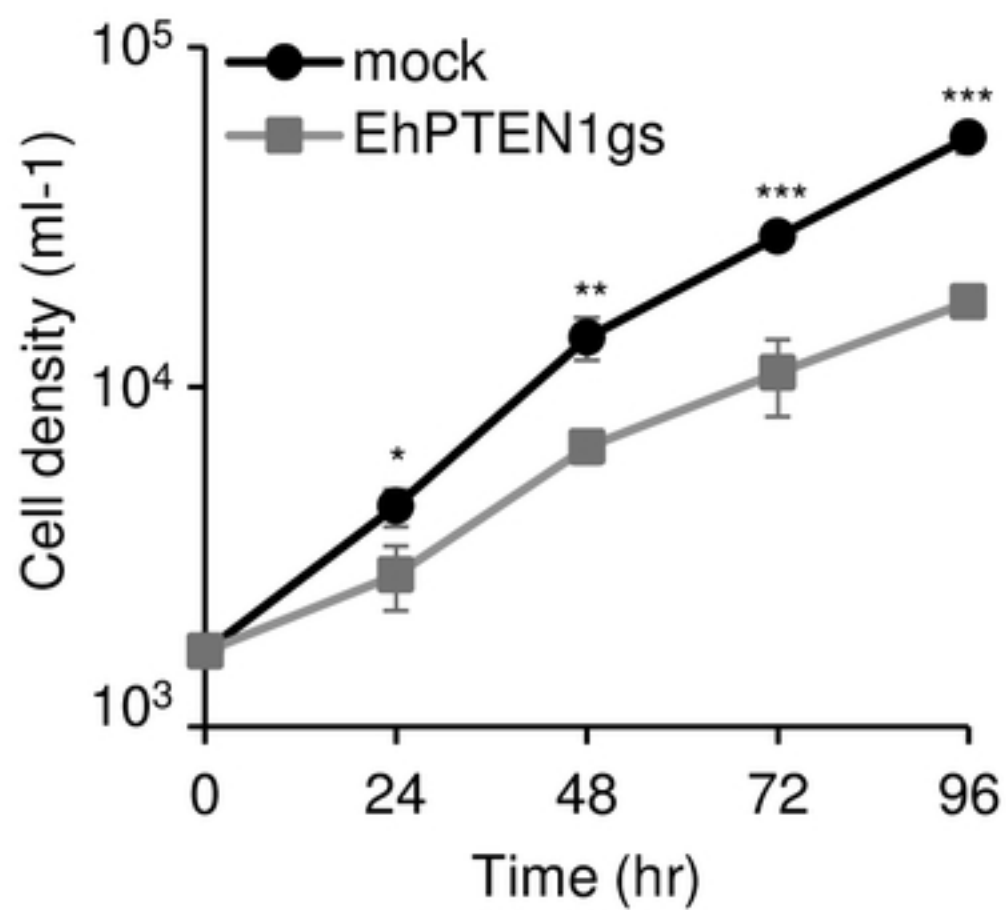

D

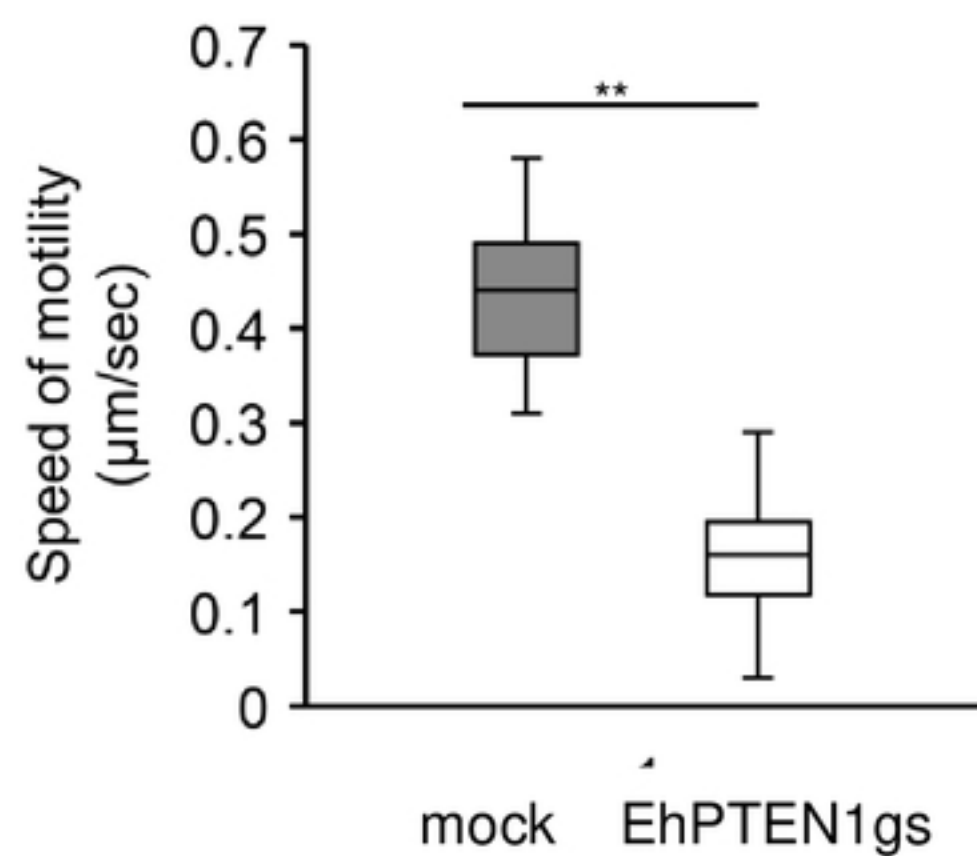

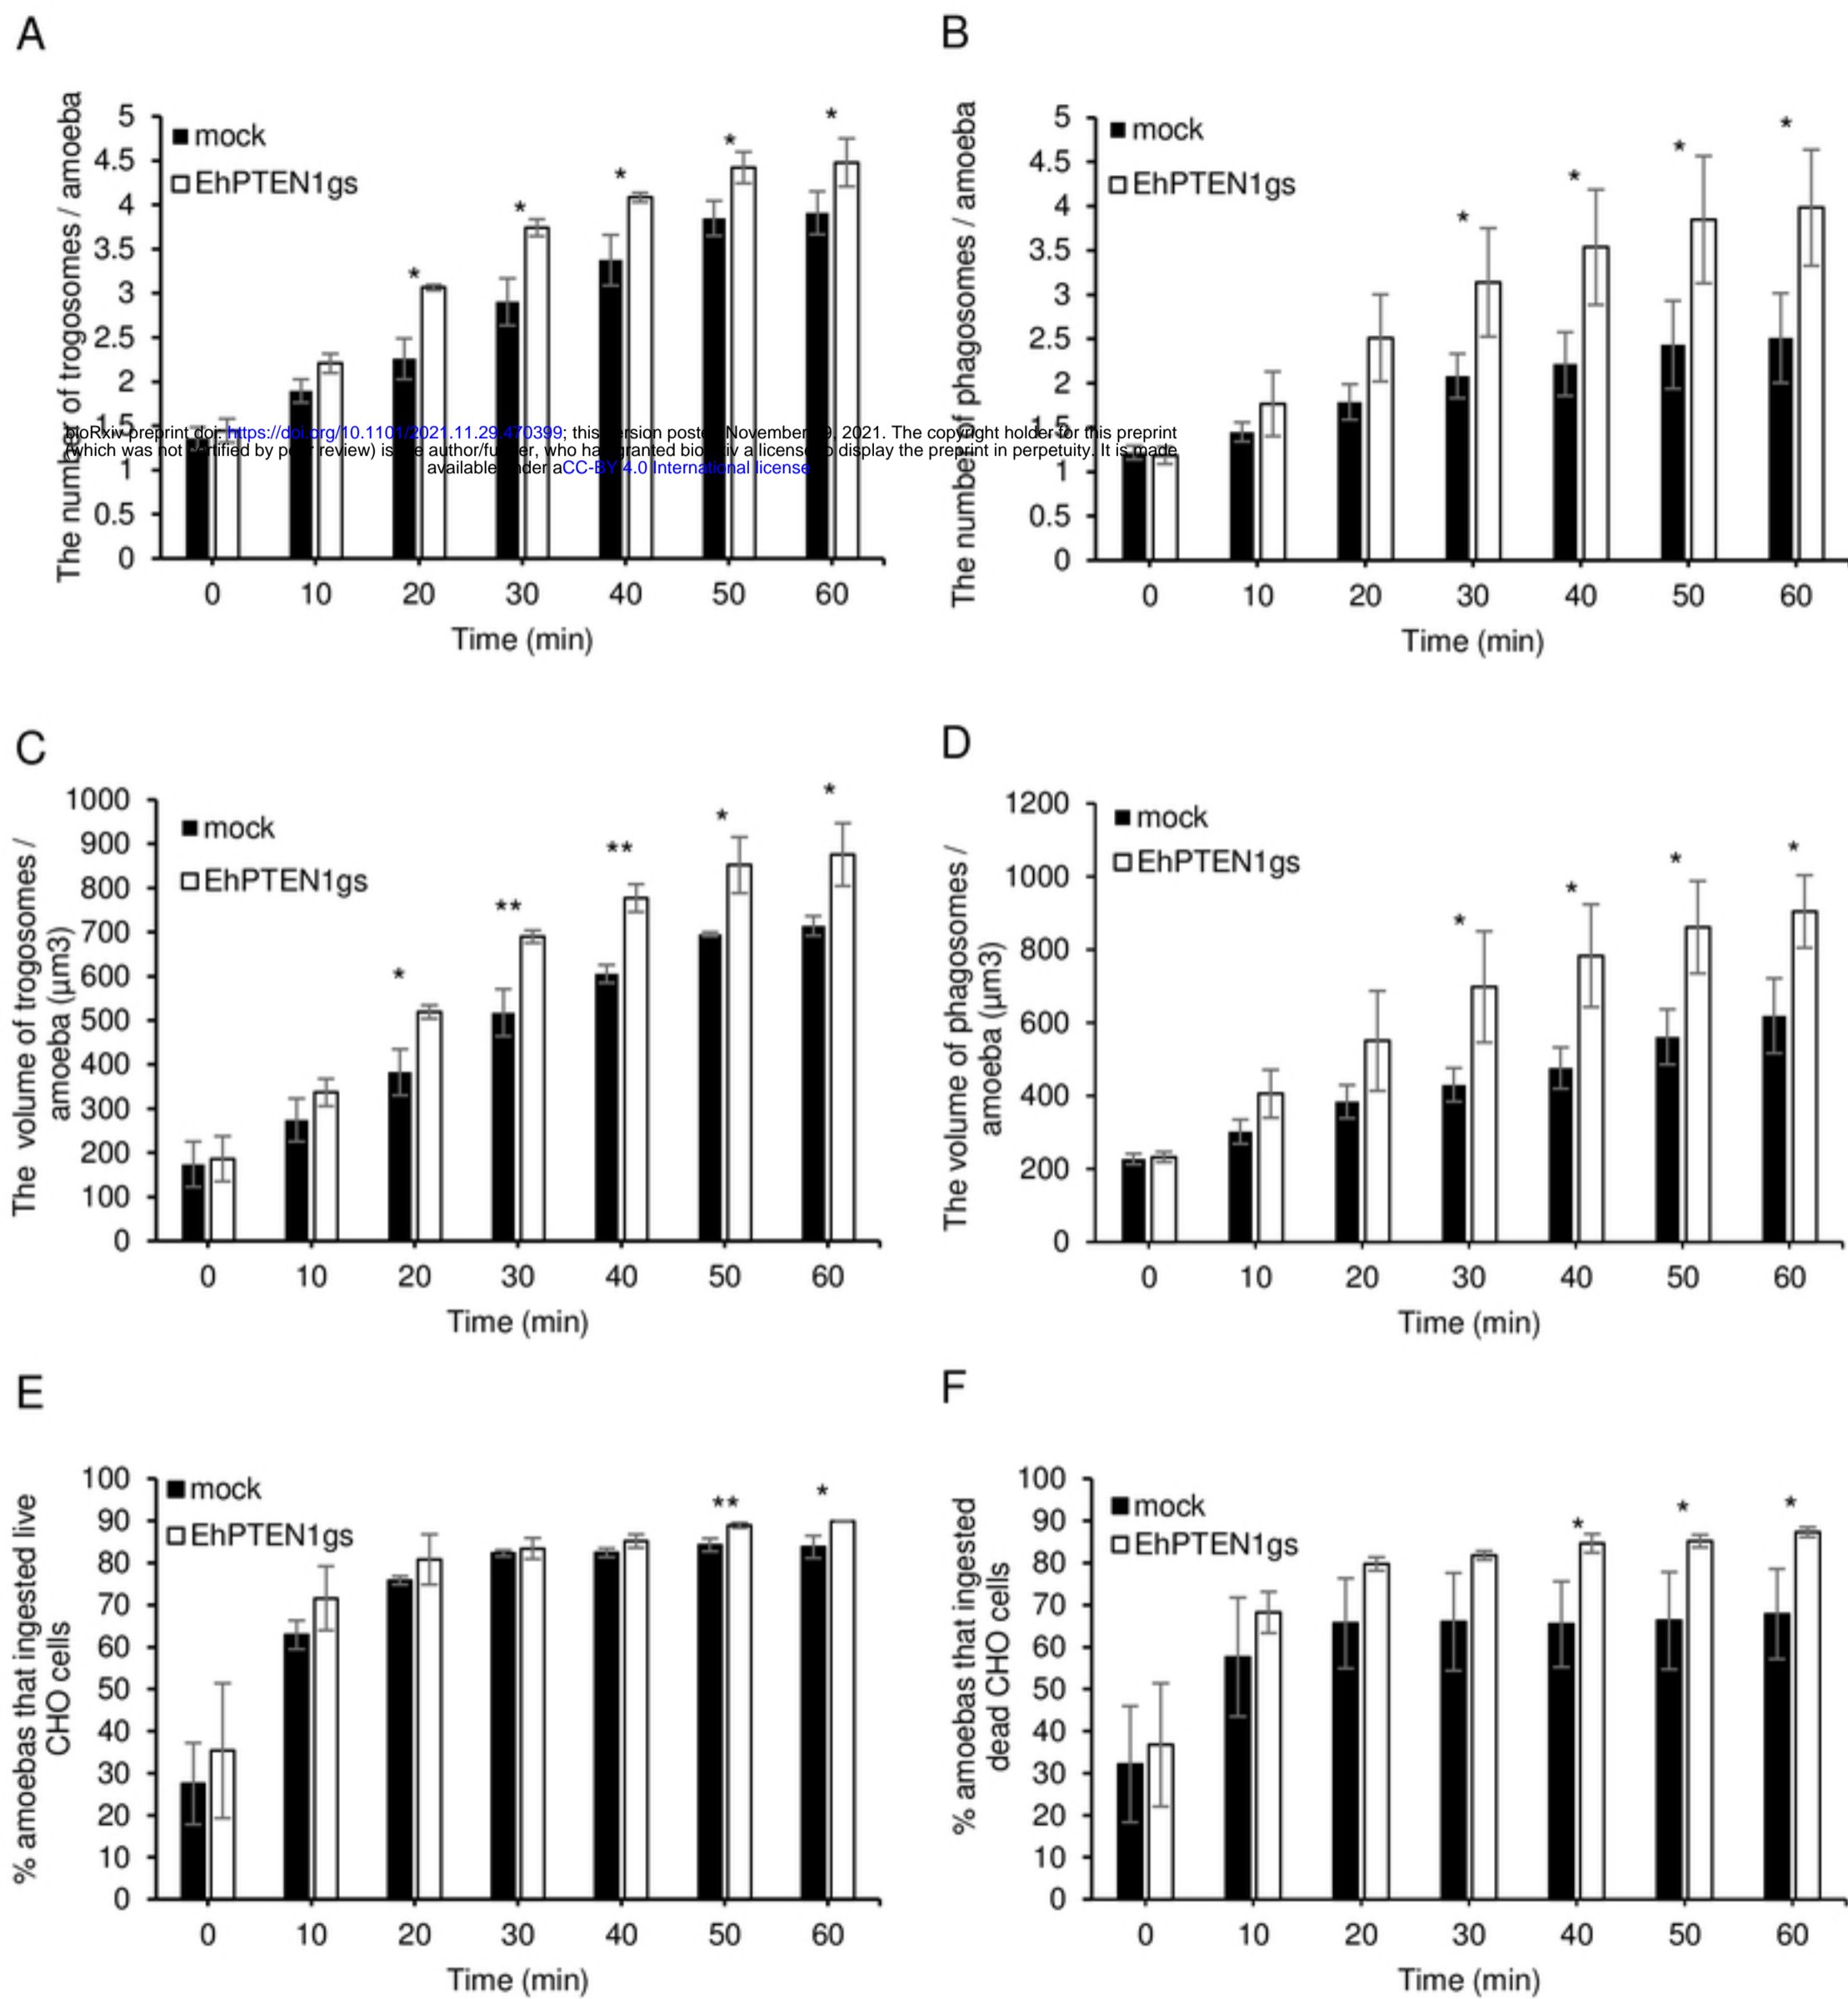

Fig8

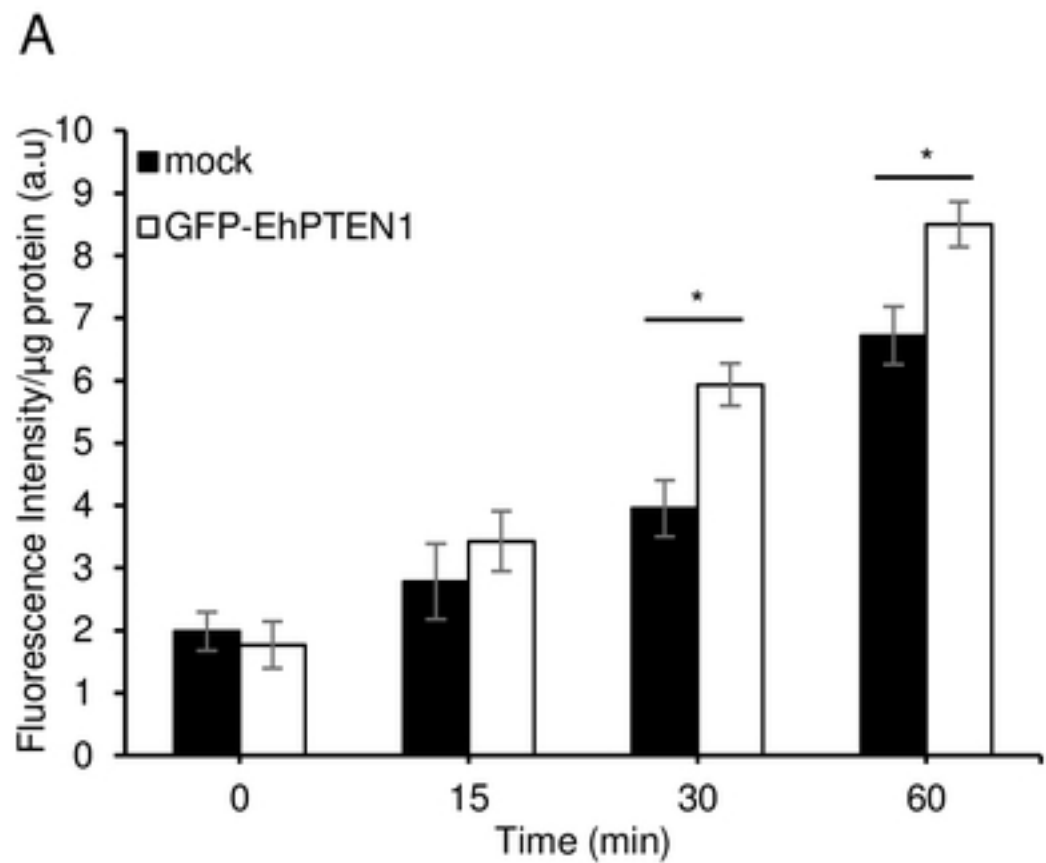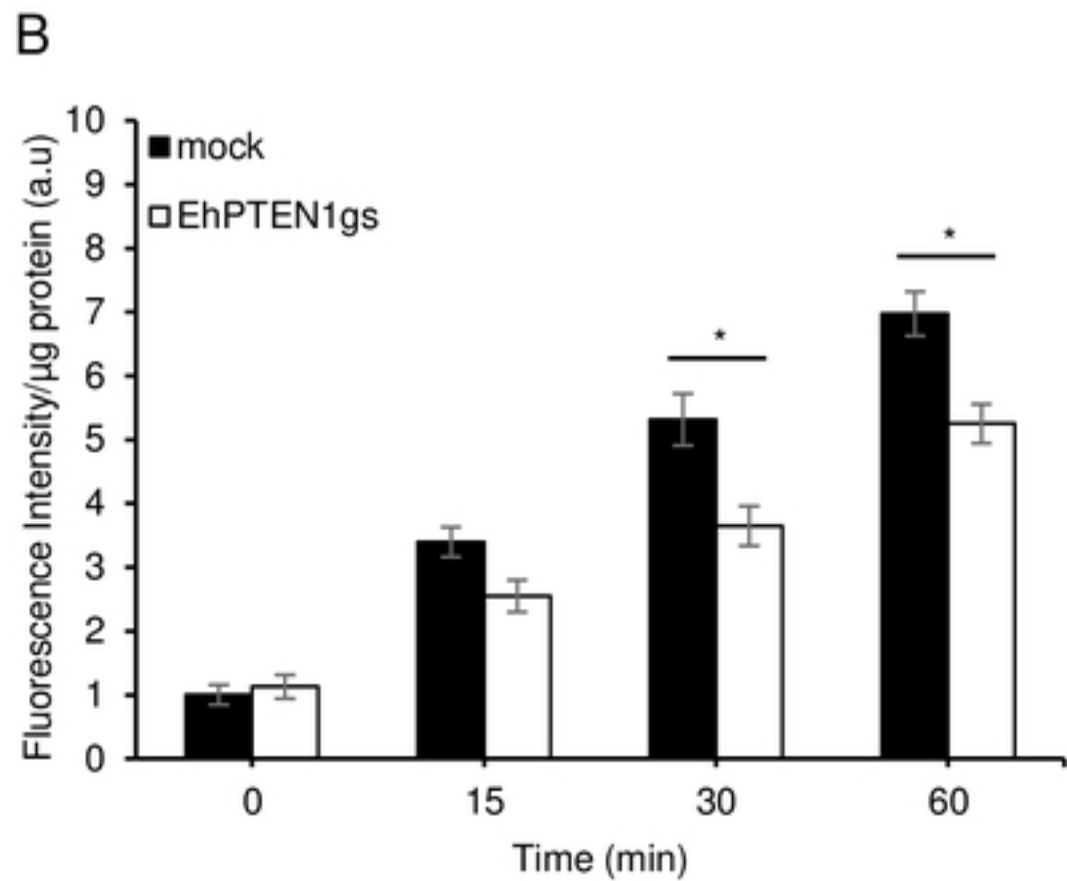

Fig9



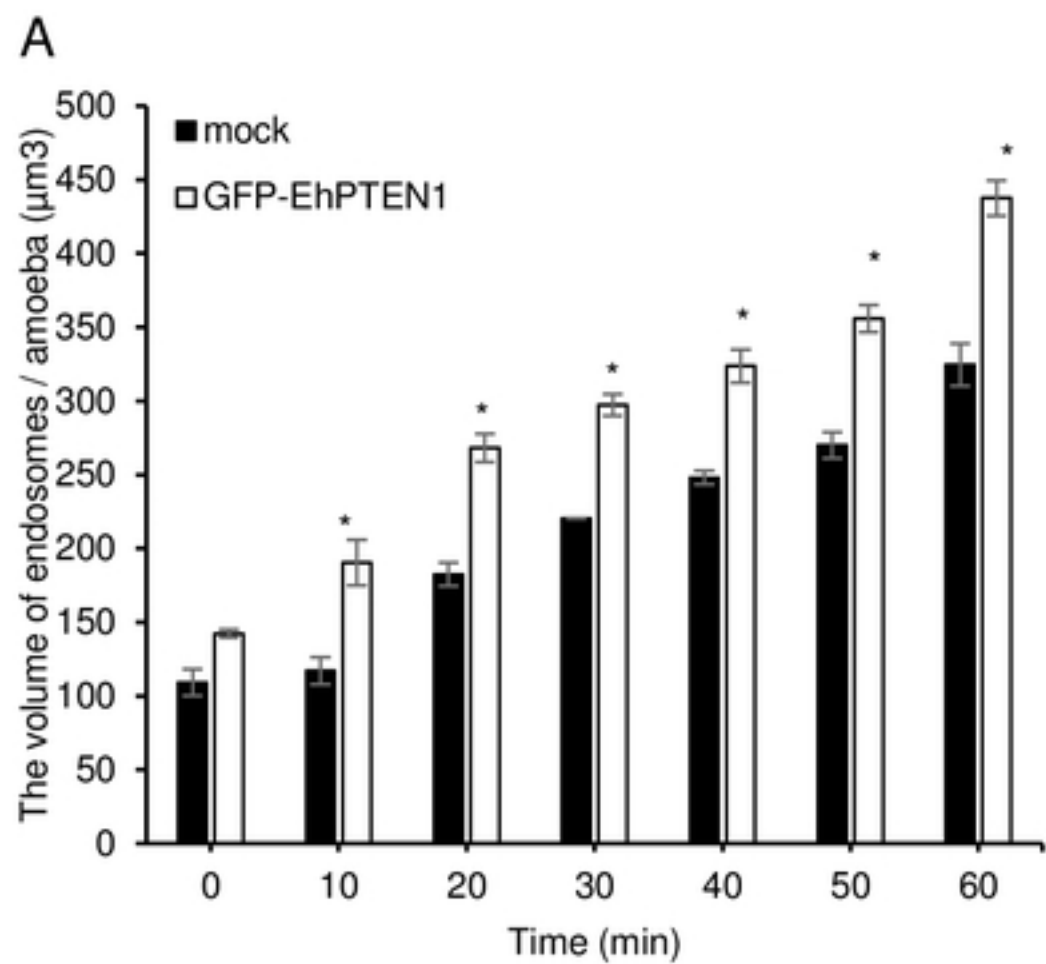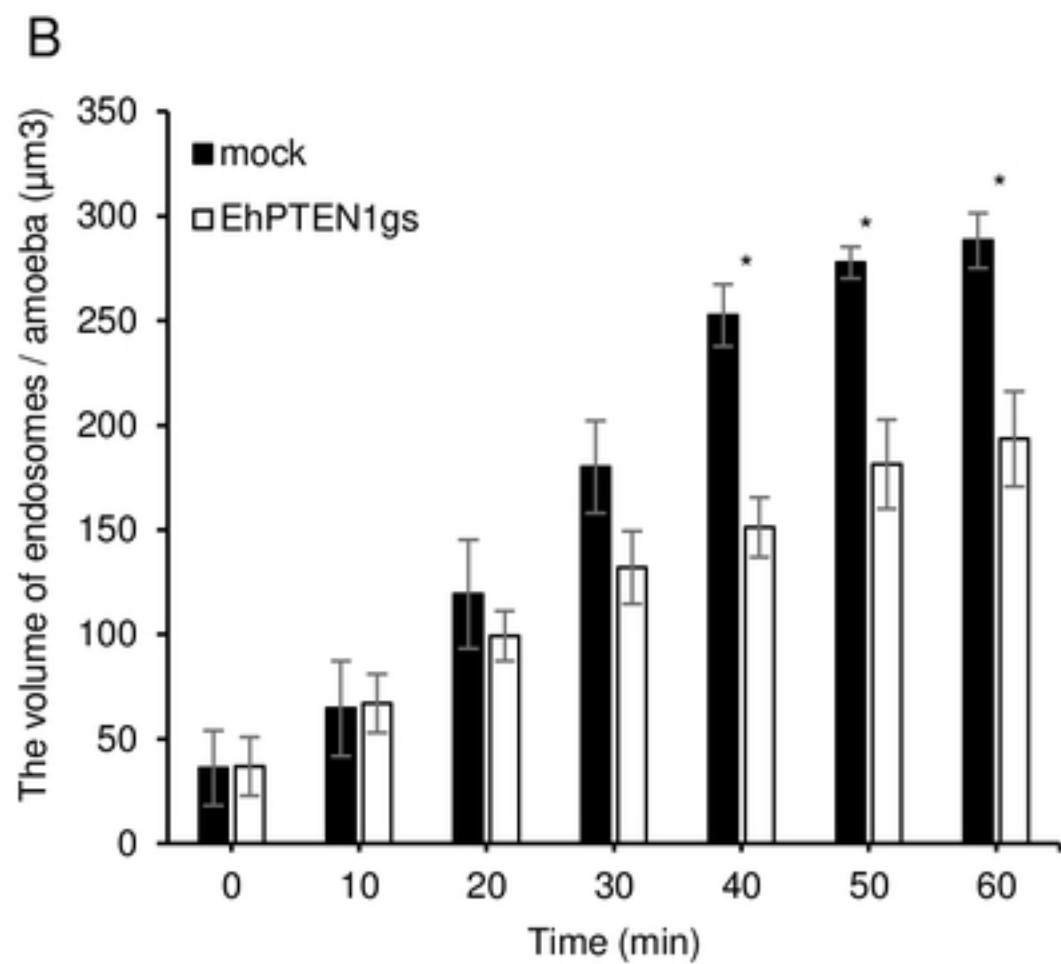

Fig10

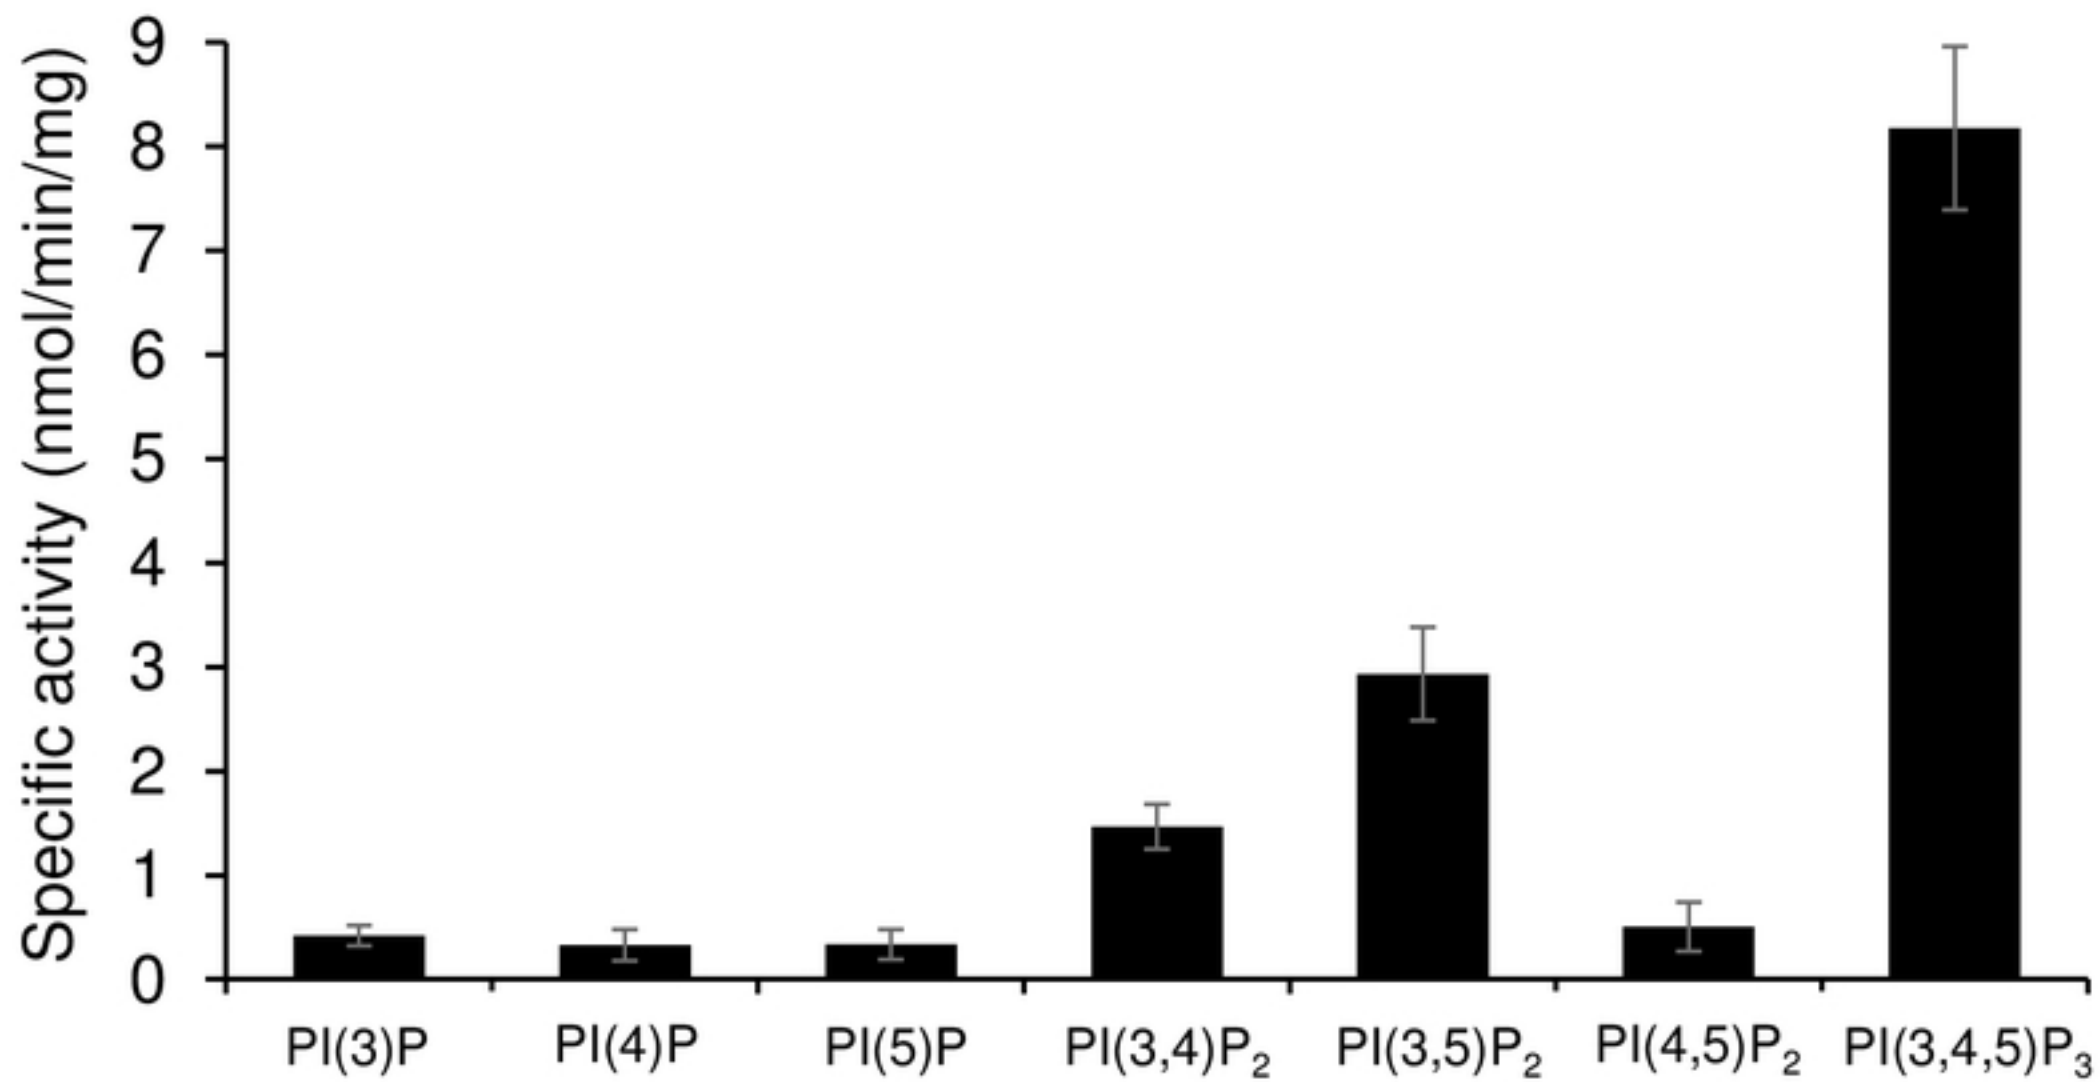

Fig11
